# Supplementary material for: Theoretical study of small sodium–potassium alloy clusters through genetic algorithm and quantum chemical calculations
Source: Royal Society of Chemistry journal article supplement (doi:10.1039/c3cp55379e), 2014-01-01
Supplement: c3cp55379e1.pdf [file c3cp55379e1.pdf]

# Theoretical study of small sodium-potassium alloy clusters through genetic algorithm and quantum chemical calculations

Mateus X. Silva, Breno R. L. Galvão and Jadson C. Belchior

Supplementary Information

## Part I

Structures obtained at the GA/Gupta level

Na2  
energy = -0.5751751993 eV

|    |           |           |           |
|----|-----------|-----------|-----------|
| Na | -1.593442 | -0.147552 | 0.482175  |
| Na | 1.593442  | 0.147552  | -0.482175 |

Na3  
energy = -1.159436004 eV

|    |           |           |           |
|----|-----------|-----------|-----------|
| Na | 0.949385  | 1.736597  | -0.371319 |
| Na | 1.000455  | -1.742618 | -0.131740 |
| Na | -1.949840 | 0.006020  | 0.503059  |

Na4  
energy = -1.837674540 eV

|    |           |           |           |
|----|-----------|-----------|-----------|
| Na | -1.668002 | -0.267329 | 1.390329  |
| Na | -0.124196 | 1.983321  | -0.915273 |
| Na | -0.098547 | -1.530654 | -1.560159 |
| Na | 1.890745  | -0.185338 | 1.085102  |

Na5  
energy = -2.512459489 eV

|    |           |           |           |
|----|-----------|-----------|-----------|
| Na | -0.300512 | 1.002858  | -1.843453 |
| Na | -2.288601 | -1.651780 | -0.525509 |
| Na | 1.227760  | -1.726443 | 0.079652  |
| Na | 2.288600  | 1.651781  | 0.525510  |
| Na | -0.927247 | 0.723584  | 1.763799  |

Na6  
energy = -3.267639497 eV

|    |           |           |           |
|----|-----------|-----------|-----------|
| Na | -1.949835 | 1.641088  | 0.000070  |
| Na | -1.641081 | -1.949831 | 0.004124  |
| Na | -0.002710 | -0.003113 | -2.548530 |
| Na | 0.002711  | 0.003113  | 2.548529  |
| Na | 1.641082  | 1.949829  | -0.004124 |
| Na | 1.949833  | -1.641086 | -0.000069 |

Na7  
energy = -3.979762732 eV

|    |           |           |           |
|----|-----------|-----------|-----------|
| Na | -1.132911 | 0.505999  | -2.777590 |
| Na | 2.099685  | 1.497843  | -1.613140 |
| Na | 0.758682  | -1.737752 | -0.626027 |
| Na | -2.799878 | -1.185090 | -0.103490 |
| Na | -0.758678 | 1.737754  | 0.626028  |
| Na | 2.430600  | 0.419701  | 1.780603  |
| Na | -0.597500 | -1.238454 | 2.713617  |

Na8  
energy = -4.717738626 eV

|    |           |           |           |
|----|-----------|-----------|-----------|
| Na | -2.209646 | 0.007506  | 1.066511  |
| Na | -2.032088 | -1.416929 | -2.239079 |
| Na | -0.673386 | -3.217244 | 0.588604  |
| Na | -0.519075 | 1.778595  | -1.608506 |
| Na | -0.078932 | 2.798700  | 1.819793  |
| Na | 1.237200  | -0.548529 | 2.046593  |
| Na | 1.491526  | -1.237571 | -1.504617 |
| Na | 2.784403  | 1.835472  | -0.169300 |

Na9  
energy = -5.468013517 eV

|    |           |           |           |
|----|-----------|-----------|-----------|
| Na | 0.088405  | 0.663840  | -2.669437 |
| Na | -0.570351 | -2.834936 | -2.118390 |
| Na | 2.663566  | 2.282437  | -0.738692 |
| Na | 2.337205  | -1.304081 | -0.641342 |
| Na | -2.667669 | -0.338491 | -0.586052 |
| Na | -0.793941 | 2.626528  | 0.213333  |
| Na | -0.418864 | -2.306407 | 1.442055  |
| Na | 1.454859  | 0.658602  | 2.241442  |
| Na | -2.093209 | 0.552507  | 2.857083  |

Na10  
energy = -6.249660636 eV

|    |           |           |           |
|----|-----------|-----------|-----------|
| Na | -2.690325 | -0.234077 | -0.936569 |
| Na | -1.291055 | -1.222106 | 2.238157  |
| Na | -1.248745 | 2.246929  | 1.249654  |
| Na | -0.673803 | -3.268422 | -0.720207 |
| Na | -0.604542 | 2.412312  | -2.338929 |
| Na | -0.387650 | -1.025708 | -3.616239 |
| Na | 1.177652  | -0.178051 | -0.574461 |
| Na | 1.686804  | 0.794355  | 2.859901  |
| Na | 1.980039  | -2.697538 | 1.755652  |
| Na | 2.051625  | 3.172308  | 0.083041  |

Na11  
energy = -7.045905955 eV

|    |           |           |           |
|----|-----------|-----------|-----------|
| Na | -0.486813 | 1.879903  | -2.631943 |
| Na | -0.009714 | -1.730840 | -2.478756 |
| Na | 2.890524  | 0.466628  | -2.029606 |
| Na | -2.894671 | -0.197195 | -0.849718 |
| Na | 1.734866  | 3.491406  | -0.214558 |
| Na | 2.475832  | -2.560293 | 0.085624  |
| Na | 0.507701  | 0.337033  | 0.581844  |
| Na | -1.840847 | 2.981813  | 0.642056  |
| Na | -1.150868 | -2.967062 | 0.755132  |
| Na | -2.255593 | -0.045122 | 2.757259  |
| Na | 1.029583  | -1.656272 | 3.382665  |

Na12  
energy = -7.929993175 eV

|    |           |           |           |
|----|-----------|-----------|-----------|
| Na | -2.183405 | 0.109450  | -2.952776 |
| Na | 0.937202  | 2.121900  | -2.849089 |
| Na | 1.127584  | -1.604004 | -2.804129 |
| Na | -1.706733 | -2.867777 | -0.755155 |
| Na | 3.347975  | 0.391984  | -0.587184 |
| Na | -0.196239 | 0.308500  | -0.081195 |
| Na | -3.643878 | 0.079295  | 0.462615  |
| Na | 1.405365  | 3.335531  | 0.630412  |
| Na | 1.690214  | -2.656940 | 0.699296  |
| Na | -1.425905 | 2.073118  | 2.677158  |
| Na | -1.238085 | -1.652852 | 2.728111  |
| Na | 1.885905  | 0.361794  | 2.831936  |

Na13  
energy = -8.886758701 eV

|    |           |           |           |
|----|-----------|-----------|-----------|
| Na | -0.267423 | 1.255968  | -3.308950 |
| Na | -0.011896 | -2.401757 | -2.613340 |
| Na | 2.922647  | -0.177356 | -2.006191 |

|    |           |           |           |
|----|-----------|-----------|-----------|
| Na | -3.095270 | -0.530781 | -1.653980 |
| Na | 1.652907  | 3.068383  | -0.671604 |
| Na | -2.066371 | 2.849947  | -0.453923 |
| Na | 0.000000  | 0.000001  | 0.000001  |
| Na | 2.066371  | -2.849947 | 0.453923  |
| Na | -1.652908 | -3.068384 | 0.671604  |
| Na | 3.095269  | 0.530781  | 1.653980  |
| Na | -2.922646 | 0.177356  | 2.006191  |
| Na | 0.011896  | 2.401756  | 2.613339  |
| Na | 0.267423  | -1.255968 | 3.308949  |

Na14  
energy = -9.601875085 eV

|    |           |           |           |
|----|-----------|-----------|-----------|
| Na | -3.339916 | 0.712211  | -1.312202 |
| Na | -2.944250 | -2.364217 | 0.715497  |
| Na | -2.433026 | 0.972105  | 2.327942  |
| Na | -1.551804 | -2.202217 | -2.740863 |
| Na | -0.847758 | 3.159814  | -0.193472 |
| Na | -0.175558 | 1.234694  | -3.275466 |
| Na | -0.154985 | -1.914837 | 3.113470  |
| Na | -0.147395 | -0.302638 | -0.073563 |
| Na | 0.410982  | -3.821138 | -0.013538 |
| Na | 1.214070  | 1.459148  | 2.671582  |
| Na | 2.104596  | -1.651963 | -2.495164 |
| Na | 2.181751  | 4.479605  | 1.088922  |
| Na | 2.676845  | 1.629309  | -0.959268 |
| Na | 3.006449  | -1.389878 | 1.146123  |

Na15  
energy = -10.43702950 eV

|    |           |           |           |
|----|-----------|-----------|-----------|
| Na | -1.841313 | 0.102071  | -3.347856 |
| Na | 1.311194  | 1.540553  | -3.242929 |
| Na | 1.100875  | -2.244159 | -2.310322 |
| Na | -1.427747 | 3.234858  | -1.451313 |
| Na | -2.632002 | -2.499629 | -1.197375 |
| Na | 3.673065  | 0.377318  | -0.987492 |
| Na | -3.704284 | 0.902260  | -0.270264 |
| Na | 1.755992  | 3.393798  | -0.088561 |
| Na | -0.000001 | 0.000007  | 0.000004  |
| Na | -0.270047 | -3.662876 | 1.057965  |
| Na | 2.882473  | -2.224409 | 1.162966  |
| Na | -2.797100 | -1.271458 | 2.273470  |
| Na | -1.100894 | 2.244151  | 2.310333  |
| Na | 2.663140  | 1.220098  | 2.455187  |
| Na | 0.386649  | -1.112583 | 3.636188  |

K2  
energy = -0.4918877380 eV

|   |           |           |           |
|---|-----------|-----------|-----------|
| K | -0.277332 | -1.087272 | -1.739193 |
| K | 0.277332  | 1.087272  | 1.739193  |

K3  
energy = -0.9923030375 eV

|   |           |           |           |
|---|-----------|-----------|-----------|
| K | -1.132554 | 1.858161  | -1.198908 |
| K | -0.729968 | -2.345623 | -0.371510 |
| K | 1.862523  | 0.487462  | 1.570418  |

K4  
energy = -1.573476151 eV

|   |           |           |           |
|---|-----------|-----------|-----------|
| K | -2.246573 | -0.596154 | -1.361850 |
| K | 1.676757  | 1.380193  | -1.593952 |
| K | 1.194638  | -2.277289 | 0.802449  |

|   |           |          |          |
|---|-----------|----------|----------|
| K | -0.624822 | 1.493250 | 2.153353 |
|---|-----------|----------|----------|

K5  
energy = -2.148114420 eV

|   |           |           |           |
|---|-----------|-----------|-----------|
| K | 1.287044  | -0.157063 | -2.255259 |
| K | -0.909999 | -3.416714 | -0.281376 |
| K | -2.514104 | 0.668030  | 0.019066  |
| K | 0.909999  | 3.416715  | 0.281371  |
| K | 1.227059  | -0.510967 | 2.236199  |

K6  
energy = -2.789337011 eV

|   |           |           |           |
|---|-----------|-----------|-----------|
| K | -3.021151 | -0.055127 | -0.842403 |
| K | -0.829867 | -0.380617 | 3.001086  |
| K | -0.154953 | 3.113222  | 0.351991  |
| K | 0.154955  | -3.113222 | -0.351991 |
| K | 0.829865  | 0.380614  | -3.001087 |
| K | 3.021151  | 0.055131  | 0.842402  |

K7  
energy = -3.394283857 eV

|   |           |           |           |
|---|-----------|-----------|-----------|
| K | 0.321467  | -0.584552 | -3.696347 |
| K | 0.230404  | 3.347110  | -1.688725 |
| K | -0.031722 | -3.708392 | -0.595743 |
| K | -2.418355 | 0.055887  | -0.219160 |
| K | 2.418345  | -0.055895 | 0.219162  |
| K | -0.179085 | 2.653188  | 2.652652  |
| K | -0.341055 | -1.707347 | 3.328160  |

K8  
energy = -4.015251062 eV

|   |           |           |           |
|---|-----------|-----------|-----------|
| K | -3.922285 | -0.686165 | 1.060445  |
| K | -1.537628 | 2.316998  | -1.162044 |
| K | -0.996678 | -2.026193 | -1.996097 |
| K | -0.606900 | -3.434354 | 2.194669  |
| K | -0.202421 | 0.935291  | 2.857888  |
| K | 1.956569  | 0.911746  | -3.510036 |
| K | 2.572623  | 3.208786  | 0.254929  |
| K | 2.736720  | -1.226109 | 0.300245  |

K9  
energy = -4.645728349 eV

|   |           |           |           |
|---|-----------|-----------|-----------|
| K | -3.113304 | -1.229628 | -0.523117 |
| K | -3.097425 | 3.148252  | 0.218595  |
| K | -1.203651 | 0.394698  | 3.142226  |
| K | -0.632435 | -3.869627 | 2.044342  |
| K | -0.588833 | 1.427170  | -3.015717 |
| K | 0.837651  | -2.634048 | -1.959182 |
| K | 1.320823  | 3.051512  | 0.649632  |
| K | 2.747303  | -1.009714 | 1.706173  |
| K | 3.729871  | 0.721386  | -2.262952 |

K10  
energy = -5.311650905 eV

|   |           |           |           |
|---|-----------|-----------|-----------|
| K | -0.694561 | 2.004279  | -2.800923 |
| K | -0.062340 | -2.390161 | -2.574486 |
| K | 3.201052  | 0.388643  | -1.395281 |
| K | -3.977479 | -0.635531 | -1.228200 |

|   |           |           |          |
|---|-----------|-----------|----------|
| K | -3.129284 | 3.398394  | 0.651838 |
| K | 1.371049  | 3.918775  | 0.704453 |
| K | -2.056591 | -4.057518 | 1.036037 |
| K | 2.407235  | -3.283463 | 1.075565 |
| K | -0.539412 | -0.000609 | 1.494249 |
| K | 3.480331  | 0.657189  | 3.036748 |

K11  
energy = -5.982391874 eV

|   |           |           |           |
|---|-----------|-----------|-----------|
| K | 1.220795  | -1.121966 | -4.065594 |
| K | -3.094086 | 0.340455  | -3.694835 |
| K | 0.261135  | 3.084352  | -2.570604 |
| K | 3.573476  | 0.720714  | -0.692159 |
| K | 2.433218  | -3.630789 | -0.418337 |
| K | -0.769550 | -0.679398 | -0.211518 |
| K | -3.389768 | 2.786303  | 0.155438  |
| K | 0.760338  | 3.105347  | 1.883288  |
| K | -1.012784 | -3.966189 | 2.566095  |
| K | 2.194568  | -0.916344 | 3.245548  |
| K | -2.177343 | 0.277514  | 3.802680  |

K12  
energy = -6.728078751 eV

|   |           |           |           |
|---|-----------|-----------|-----------|
| K | -0.766555 | -1.477693 | -3.595203 |
| K | 2.762343  | 1.312792  | -2.892197 |
| K | -1.519229 | 2.909408  | -2.635528 |
| K | 2.798536  | -2.922983 | -1.158957 |
| K | -4.129213 | -0.339591 | -0.743667 |
| K | -1.460667 | -3.944210 | 0.168924  |
| K | 0.090957  | 0.175332  | 0.426577  |
| K | 1.599620  | 4.215789  | 0.459478  |
| K | 4.277056  | 0.599196  | 1.374975  |
| K | -2.673776 | 3.191180  | 1.791697  |
| K | 1.658389  | -2.660553 | 3.273202  |
| K | -2.637462 | -1.058666 | 3.530698  |

K13  
energy = -7.539674980 eV

|   |           |           |           |
|---|-----------|-----------|-----------|
| K | -4.334559 | 0.325354  | 0.442673  |
| K | -2.429717 | -2.223515 | -2.871013 |
| K | -2.101202 | 2.356379  | -3.020374 |
| K | -2.079351 | -3.529507 | 1.519578  |
| K | -1.547809 | 3.880911  | 1.277905  |
| K | -1.534301 | 0.243236  | 4.083743  |
| K | 0.000000  | 0.000000  | 0.000000  |
| K | 1.534301  | -0.243236 | -4.083743 |
| K | 1.547809  | -3.880911 | -1.277905 |
| K | 2.079351  | 3.529506  | -1.519577 |
| K | 2.101203  | -2.356379 | 3.020374  |
| K | 2.429717  | 2.223515  | 2.871013  |
| K | 4.334559  | -0.325354 | -0.442673 |

K14  
energy = -8.136542191 eV

|   |           |           |           |
|---|-----------|-----------|-----------|
| K | -4.475840 | -0.418217 | 0.218544  |
| K | -2.841302 | 3.530006  | -1.396283 |
| K | -2.610001 | -0.279644 | -3.948846 |
| K | -2.028811 | 2.362977  | 2.982297  |
| K | -1.653939 | -3.811249 | -1.154515 |
| K | -1.426390 | -2.154692 | 3.086652  |
| K | -0.168538 | 0.219701  | -0.343184 |
| K | 0.943406  | 2.625945  | -3.833802 |
| K | 1.286556  | 4.293776  | 0.405119  |
| K | 1.661670  | -1.884243 | -3.734211 |
| K | 2.272939  | 0.870290  | 3.206405  |
| K | 2.421561  | -3.156621 | 4.930798  |

|   |          |           |           |
|---|----------|-----------|-----------|
| K | 2.513723 | -3.095864 | 0.549087  |
| K | 4.104968 | 0.897837  | -0.968063 |

K15  
energy = -8.826129514 eV

|   |           |           |           |
|---|-----------|-----------|-----------|
| K | -2.018515 | 0.436569  | -4.234836 |
| K | 2.477611  | -0.100895 | -4.006325 |
| K | -0.002421 | -3.483093 | -3.172800 |
| K | 0.338565  | 3.728841  | -2.860133 |
| K | -3.957018 | -2.129338 | -1.416526 |
| K | 4.080028  | 2.219244  | -0.791686 |
| K | -3.393988 | 2.466883  | -0.088592 |
| K | -0.000001 | 0.000000  | 0.000000  |
| K | 3.393984  | -2.466867 | 0.088602  |
| K | -0.880031 | -4.545145 | 0.875236  |
| K | 0.756974  | 4.455177  | 1.332960  |
| K | -3.538534 | -1.402930 | 2.776550  |
| K | 3.202441  | 1.157229  | 3.256347  |
| K | 0.722414  | -2.224989 | 4.089841  |
| K | -1.181511 | 1.889313  | 4.151362  |

Na1K1  
energy = -0.5320626040 eV

|    |           |           |           |
|----|-----------|-----------|-----------|
| Na | 1.793017  | 0.476248  | -0.230959 |
| K  | -1.793017 | -0.476248 | 0.230959  |

Na1K2  
energy = -1.046777485 eV

|    |           |           |           |
|----|-----------|-----------|-----------|
| Na | 0.997988  | -1.865265 | 0.388617  |
| K  | -1.534017 | 0.030714  | -1.865303 |
| K  | 0.536029  | 1.834551  | 1.476686  |

Na1K3  
energy = -1.638358942 eV

|    |           |           |           |
|----|-----------|-----------|-----------|
| K  | -1.448251 | 1.682035  | -1.465214 |
| K  | -1.439634 | -2.053236 | 0.886115  |
| K  | 2.202204  | -0.790791 | -1.264306 |
| Na | 0.685681  | 1.161991  | 1.843405  |

Na1K4  
energy = -2.225985157 eV

|    |           |           |           |
|----|-----------|-----------|-----------|
| K  | -2.268037 | 0.856514  | 0.909614  |
| K  | -0.778547 | 1.053462  | -3.241784 |
| K  | 0.284057  | -2.453115 | -0.778809 |
| K  | 1.121116  | -0.777781 | 3.219198  |
| Na | 1.641410  | 1.320920  | -0.108218 |

Na1K5  
energy = -2.869413144 eV

|    |           |           |           |
|----|-----------|-----------|-----------|
| K  | -0.167143 | -2.213185 | -2.264178 |
| K  | -2.995977 | 0.841667  | -0.606924 |
| K  | 3.059594  | -0.698382 | 0.451402  |
| K  | -0.858047 | -1.932462 | 2.097515  |
| K  | 0.230770  | 2.356467  | 2.108659  |
| Na | 0.730802  | 1.645895  | -1.786474 |

Na1K6



energy = -3.493872818 eV

|    |           |           |           |
|----|-----------|-----------|-----------|
| K  | -1.172819 | -0.128594 | -3.541708 |
| K  | 0.503994  | 3.377164  | -1.508801 |
| K  | -1.396308 | -3.403671 | -0.633312 |
| K  | 2.229505  | -0.705213 | -0.622811 |
| K  | 1.316818  | 2.268775  | 2.656008  |
| K  | 0.142394  | -1.922018 | 3.197078  |
| Na | -1.623584 | 0.513557  | 0.453545  |

Na1K7  
energy = -4.128801269 eV

|    |           |           |           |
|----|-----------|-----------|-----------|
| K  | -1.966825 | -2.315928 | -2.622885 |
| K  | -2.566146 | 1.895245  | -0.930305 |
| K  | 1.504135  | 3.864796  | -0.465584 |
| K  | 4.095325  | 0.288779  | 0.748830  |
| K  | 1.030066  | -3.067766 | 0.755172  |
| K  | -3.152627 | -1.752421 | 1.566441  |
| K  | 0.122606  | 0.963361  | 2.575112  |
| Na | 0.933466  | 0.123934  | -1.626782 |

Na1K8  
energy = -4.819281722 eV

|    |           |           |           |
|----|-----------|-----------|-----------|
| K  | -0.981648 | 1.223895  | -3.518635 |
| K  | 2.568153  | -1.603186 | -2.382584 |
| K  | -1.852073 | -2.971368 | -1.607164 |
| K  | -0.104468 | 3.842569  | 0.257139  |
| K  | -3.741880 | 0.879294  | 0.259453  |
| K  | 3.445308  | 1.015499  | 1.393185  |
| K  | 1.278172  | -3.118707 | 1.866026  |
| K  | -0.611593 | 0.731985  | 3.732597  |
| Na | 0.000029  | 0.000019  | -0.000017 |

Na1K9  
energy = -5.563842455 eV

|    |           |           |           |
|----|-----------|-----------|-----------|
| K  | -3.237001 | 0.825337  | -2.018982 |
| K  | -2.523849 | 2.154691  | 2.241734  |
| K  | -1.948930 | -2.323257 | 2.457575  |
| K  | -1.311009 | -3.262334 | -1.917391 |
| K  | 0.242359  | 3.780206  | -0.941833 |
| K  | 1.062601  | 0.117332  | -3.754006 |
| K  | 1.530461  | 0.631546  | 3.534757  |
| K  | 2.350553  | -3.031236 | 0.722397  |
| K  | 3.834814  | 1.107701  | -0.324261 |
| Na | 0.000001  | 0.000014  | 0.000009  |

Na1K10  
energy = -6.276497763 eV

|    |           |           |           |
|----|-----------|-----------|-----------|
| K  | -3.794866 | -0.803018 | -0.760832 |
| K  | -3.049294 | 1.850397  | 2.660864  |
| K  | -1.405072 | 3.543793  | -1.045003 |
| K  | -1.077496 | -2.037193 | 3.211473  |
| K  | -0.680101 | 0.119470  | -3.891969 |
| K  | -0.448502 | -3.826871 | -0.882193 |
| K  | 1.312230  | 2.309571  | 2.927211  |
| K  | 2.931108  | 2.320277  | -1.284217 |
| K  | 3.049283  | -1.850493 | -2.660917 |
| K  | 3.162752  | -1.625953 | 1.725563  |
| Na | -0.000043 | 0.000021  | 0.000021  |

Na1K11  
energy = -6.956817740 eV

|    |           |           |           |
|----|-----------|-----------|-----------|
| Na | 0.139393  | -0.205971 | 0.125318  |
| K  | -4.002056 | -0.833193 | -0.378140 |

|   |           |           |           |
|---|-----------|-----------|-----------|
| K | -2.397736 | 2.071082  | 2.610592  |
| K | -1.963137 | 2.900882  | -1.765131 |
| K | -1.761399 | -2.329641 | 3.209394  |
| K | -1.152578 | -0.994670 | -3.812569 |
| K | -1.013950 | -4.169394 | -0.645150 |
| K | 1.443249  | 3.704504  | 1.023264  |
| K | 1.506549  | 0.393306  | 4.050200  |
| K | 2.212779  | 1.809830  | -2.946489 |
| K | 2.715542  | -2.583365 | -2.186649 |
| K | 4.273345  | 0.236629  | 0.715359  |

Na1K12  
energy = -7.776208908 eV

|    |           |           |           |
|----|-----------|-----------|-----------|
| Na | 0.000003  | 0.000013  | 0.000002  |
| K  | -3.631298 | -1.457355 | -1.641989 |
| K  | -3.495900 | 0.546093  | 2.342375  |
| K  | -2.766560 | 2.911344  | -1.369895 |
| K  | -1.638288 | -3.474525 | 1.802764  |
| K  | -0.458198 | 0.352514  | -4.203833 |
| K  | -0.239110 | 3.594153  | 2.243015  |
| K  | 0.239111  | -3.594169 | -2.243015 |
| K  | 0.458196  | -0.352513 | 4.203842  |
| K  | 1.638281  | 3.474516  | -1.802771 |
| K  | 2.766567  | -2.911331 | 1.369907  |
| K  | 3.495890  | -0.546103 | -2.342379 |
| K  | 3.631305  | 1.457363  | 1.641977  |

Na1K13  
energy = -8.366750660 eV

|    |           |           |           |
|----|-----------|-----------|-----------|
| Na | 0.012197  | -0.403032 | 0.222186  |
| K  | 1.071076  | 1.371425  | -3.464279 |
| K  | -2.353237 | -1.430150 | -3.152580 |
| K  | -0.168547 | 5.567755  | -3.069296 |
| K  | 1.853496  | -2.912988 | -2.691924 |
| K  | -2.701858 | 2.521975  | -1.169937 |
| K  | 4.151371  | 0.239360  | -0.480614 |
| K  | -1.346106 | -4.425868 | 0.005867  |
| K  | 1.404849  | 3.576115  | 0.516888  |
| K  | -4.133393 | -1.087274 | 0.948765  |
| K  | 2.670831  | -3.394888 | 1.655948  |
| K  | -1.824416 | 2.061697  | 3.153301  |
| K  | 2.383242  | 0.585378  | 3.625592  |
| K  | -1.019504 | -2.269504 | 3.900082  |

Na1K14  
energy = -9.037140847 eV

|    |           |           |           |
|----|-----------|-----------|-----------|
| Na | -0.323889 | 0.110997  | -0.736735 |
| K  | -4.255812 | -0.451930 | 0.841470  |
| K  | -3.419635 | -0.800724 | -3.518923 |
| K  | -3.185170 | 3.176318  | -1.513700 |
| K  | -1.807133 | -3.897444 | -0.754102 |
| K  | -1.409176 | 2.565594  | 2.520362  |
| K  | -0.686967 | -1.863225 | 2.969168  |
| K  | -0.124644 | 2.015352  | -4.543234 |
| K  | 0.732105  | -2.335642 | -4.066262 |
| K  | 1.009591  | 0.966230  | 5.904404  |
| K  | 1.111999  | 4.135649  | -0.827206 |
| K  | 2.504149  | -2.940826 | -0.029600 |
| K  | 2.818485  | 1.132748  | 1.879441  |
| K  | 3.475438  | -2.503223 | 4.297676  |
| K  | 3.560661  | 0.690128  | -2.422758 |

Na2K1  
energy = -1.102535403 eV

|    |           |           |           |
|----|-----------|-----------|-----------|
| Na | 0.445326  | -0.249814 | -2.026969 |
| Na | 1.530458  | 0.982904  | 1.030013  |
| K  | -1.975784 | -0.733089 | 0.996956  |

Na2K2  
energy = -1.704046020 eV

|    |           |           |           |
|----|-----------|-----------|-----------|
| Na | -1.646634 | -0.893299 | -1.263604 |
| Na | 1.136200  | 1.301163  | -1.456748 |
| K  | -1.058094 | 1.505747  | 1.862934  |
| K  | 1.568528  | -1.913610 | 0.857418  |

Na2K3  
energy = -2.303951461 eV

|    |           |           |           |
|----|-----------|-----------|-----------|
| K  | -1.691326 | 2.831739  | -1.001813 |
| K  | -0.346669 | 0.479905  | 2.504129  |
| K  | 1.750319  | -2.913405 | 0.575682  |
| Na | -1.410834 | -1.140036 | -1.073906 |
| Na | 1.698511  | 0.741797  | -1.004093 |

Na2K4  
energy = -2.953233109 eV

|    |           |           |           |
|----|-----------|-----------|-----------|
| K  | -2.585337 | -1.815708 | 0.693403  |
| K  | -1.918021 | 2.570015  | -0.421678 |
| K  | 1.918020  | -2.570013 | 0.421669  |
| K  | 2.585340  | 1.815699  | -0.693392 |
| Na | -0.223553 | -0.532282 | -2.227337 |
| Na | 0.223551  | 0.532289  | 2.227334  |

Na2K5  
energy = -3.586828598 eV

|    |           |           |           |
|----|-----------|-----------|-----------|
| K  | -2.178299 | 0.159604  | -2.980143 |
| K  | -1.650055 | -3.283379 | -0.385325 |
| K  | 0.303796  | 3.382014  | -1.456513 |
| K  | 1.158482  | -2.188827 | 2.742024  |
| K  | 2.366073  | 1.930593  | 2.079959  |
| Na | -1.385872 | 0.573984  | 1.043728  |
| Na | 1.385876  | -0.573989 | -1.043729 |

Na2K6  
energy = -4.241203149 eV

|    |           |           |           |
|----|-----------|-----------|-----------|
| K  | -2.755779 | 0.762056  | -1.705026 |
| K  | -2.408076 | 1.408546  | 2.727111  |
| K  | -0.401069 | -2.863461 | -2.941653 |
| K  | -0.015776 | 3.901161  | -0.025410 |
| K  | 2.038661  | 0.808877  | 2.504336  |
| K  | 3.000215  | -2.830241 | 0.044584  |
| Na | -0.745678 | -1.652686 | 0.867702  |
| Na | 1.287502  | 0.465748  | -1.471644 |

Na2K7  
energy = -4.897925600 eV

|    |           |           |           |
|----|-----------|-----------|-----------|
| K  | -2.794763 | 1.821498  | -2.854159 |
| K  | -1.035996 | 3.457177  | 1.100983  |
| K  | -0.899915 | -2.393493 | -2.872207 |
| K  | -0.886771 | 0.185851  | 4.098803  |
| K  | 0.718172  | -2.865457 | 1.291759  |
| K  | 2.894831  | 1.022397  | 1.931080  |
| K  | 3.590709  | -1.701854 | -1.818209 |
| Na | -2.295111 | -0.397842 | 0.419443  |
| Na | 0.708843  | 0.871723  | -1.297493 |

Na2K8  
energy = -5.647370008 eV

|    |           |           |           |
|----|-----------|-----------|-----------|
| K  | -3.460463 | 0.083210  | -1.648949 |
| K  | -2.035243 | -1.580201 | 2.839276  |
| K  | -0.903817 | -3.728382 | -1.094770 |
| K  | 0.169948  | 3.510917  | -1.531440 |
| K  | 0.527484  | -0.423897 | -3.931690 |
| K  | 1.595168  | 1.847493  | 2.956856  |
| K  | 2.377688  | -2.583188 | 1.894690  |
| K  | 3.808948  | 0.721324  | -0.942214 |
| Na | -2.173772 | 2.250077  | 1.524183  |
| Na | 0.094059  | -0.097352 | -0.065942 |

Na2K9  
energy = -6.369639067 eV

|    |           |           |           |
|----|-----------|-----------|-----------|
| K  | -1.226255 | 0.271021  | -3.776270 |
| K  | 1.682782  | -2.803240 | -2.199482 |
| K  | 2.549339  | 2.121894  | -2.127474 |
| K  | -2.436798 | -3.123852 | -0.375788 |
| K  | -1.222505 | 3.777240  | -0.274733 |
| K  | 4.230444  | -0.755299 | 0.751967  |
| K  | 0.821402  | -2.723888 | 2.726437  |
| K  | 1.687982  | 2.201482  | 2.798578  |
| K  | -2.433030 | 0.382296  | 3.125986  |
| Na | -3.657441 | 0.653061  | -0.649959 |
| Na | 0.004081  | -0.000714 | 0.000738  |

Na2K10  
energy = -7.058400739 eV

|    |           |           |           |
|----|-----------|-----------|-----------|
| K  | -1.563904 | -0.823918 | -3.906461 |
| K  | 1.308340  | 2.612432  | -2.939926 |
| K  | 2.605794  | -1.803127 | -2.464392 |
| K  | -2.864048 | 2.932315  | -1.557738 |
| K  | -0.944202 | -3.926578 | -0.517482 |
| K  | -4.267413 | -0.991192 | -0.287659 |
| K  | 3.693560  | 1.389403  | 0.525758  |
| K  | -0.209499 | 3.258262  | 1.972927  |
| K  | -1.688575 | -1.091476 | 3.254235  |
| K  | 2.173271  | 0.534989  | 4.568281  |
| Na | -0.216388 | 0.055839  | -0.239075 |
| Na | 1.973064  | -2.146948 | 1.591533  |

Na2K11  
energy = -7.875649615 eV

|    |           |           |           |
|----|-----------|-----------|-----------|
| Na | -0.038534 | 0.008777  | -0.056499 |
| Na | 1.983818  | -0.451420 | 2.907925  |
| K  | -2.363872 | 0.537943  | -3.465006 |
| K  | 1.241814  | -2.136414 | -3.417720 |
| K  | 1.753464  | 2.285679  | -3.080297 |
| K  | -2.403095 | -3.283578 | -1.109217 |
| K  | -1.575218 | 3.871532  | -0.563210 |
| K  | 4.201253  | -0.446907 | -0.513852 |
| K  | -4.144123 | 0.429512  | 0.654971  |
| K  | 1.654245  | -3.859561 | 0.693967  |
| K  | 2.475074  | 3.234555  | 1.235260  |
| K  | -1.646062 | -2.287262 | 3.189565  |
| K  | -1.138763 | 2.097145  | 3.524114  |

Na2K12  
energy = -8.500619365 eV

|    |           |           |           |
|----|-----------|-----------|-----------|
| Na | -0.418663 | 0.012508  | -0.319251 |
| Na | 2.313621  | -1.467987 | 1.420791  |
| K  | -1.034182 | -1.689064 | -4.087120 |

|   |           |           |           |
|---|-----------|-----------|-----------|
| K | 0.617994  | 2.414322  | -3.586310 |
| K | 3.129558  | -1.155602 | -2.488475 |
| K | -3.638535 | 1.571725  | -2.415269 |
| K | 0.406527  | -4.246349 | -0.729923 |
| K | -3.713171 | -2.543676 | -0.607499 |
| K | 3.099087  | 2.425126  | 0.106028  |
| K | -1.029446 | 4.114007  | 0.217885  |
| K | -3.718091 | 1.031018  | 2.045747  |
| K | -1.168452 | -2.526745 | 3.093994  |
| K | 0.420578  | 1.570569  | 3.585155  |
| K | 4.733176  | 0.490148  | 3.764249  |

Na2K13  
energy = -9.191632092 eV

|    |           |           |           |
|----|-----------|-----------|-----------|
| Na | -0.556231 | 0.070591  | -0.683739 |
| Na | 0.859239  | -1.064043 | 2.367330  |
| K  | -4.116003 | 2.270064  | -0.261625 |
| K  | -4.082519 | -1.957731 | -1.618758 |
| K  | -3.106671 | -1.041926 | 2.657358  |
| K  | -2.319387 | 1.300750  | -4.232783 |
| K  | -0.846760 | 2.757340  | 2.651358  |
| K  | -0.729783 | -4.135561 | 0.404195  |
| K  | -0.317818 | -2.673386 | -3.862015 |
| K  | -0.193509 | 4.159200  | -1.477308 |
| K  | 2.148292  | 1.111268  | -3.697126 |
| K  | 2.401540  | 1.310498  | 5.170907  |
| K  | 3.021735  | -2.277601 | -1.015616 |
| K  | 3.094844  | 1.907141  | 0.646355  |
| K  | 4.743031  | -1.736605 | 2.951467  |

Na3K1  
energy = -1.770495675 eV

|    |           |           |           |
|----|-----------|-----------|-----------|
| Na | -1.770042 | -1.260622 | -0.489740 |
| Na | -0.444417 | 2.030008  | -0.802262 |
| Na | 0.021835  | 0.201883  | 2.218294  |
| K  | 2.192624  | -0.971269 | -0.926292 |

Na3K2  
energy = -2.382013892 eV

|    |           |           |           |
|----|-----------|-----------|-----------|
| Na | -2.060144 | -0.121523 | -0.393043 |
| Na | 1.013373  | -1.650796 | 0.813261  |
| Na | 1.046773  | 1.772322  | -0.420218 |
| K  | -0.664933 | 1.135814  | 3.134082  |
| K  | 0.664930  | -1.135817 | -3.134083 |

Na3K3  
energy = -3.029575025 eV

|    |           |           |           |
|----|-----------|-----------|-----------|
| Na | 2.229080  | -0.916589 | -0.292417 |
| Na | 1.055096  | 2.446340  | -0.281407 |
| Na | -2.172656 | 1.047410  | 0.277363  |
| K  | -0.424502 | -0.036245 | -3.154516 |
| K  | -1.214778 | -2.816546 | 0.324002  |
| K  | 0.527759  | 0.275631  | 3.126975  |

Na3K4  
energy = -3.667673104 eV

|    |           |           |           |
|----|-----------|-----------|-----------|
| K  | -1.519092 | -1.708504 | -2.901553 |
| K  | -0.754486 | 0.708890  | 3.545972  |
| K  | 2.325271  | 0.365502  | -2.762282 |
| K  | 2.807881  | 1.891355  | 1.307358  |
| Na | -2.809960 | -1.235432 | 0.796440  |

|    |           |           |           |
|----|-----------|-----------|-----------|
| Na | -0.859327 | 1.569092  | -0.486393 |
| Na | 0.809713  | -1.590903 | 0.500457  |

Na3K5  
energy = -4.329252047 eV

|    |           |           |           |
|----|-----------|-----------|-----------|
| K  | -2.576736 | -1.851641 | -0.689762 |
| K  | -1.759976 | 1.868051  | -3.192731 |
| K  | -1.145651 | -1.173045 | 3.531487  |
| K  | 1.326556  | -3.580905 | 0.759856  |
| K  | 2.038586  | 3.328104  | -1.072902 |
| Na | -1.095927 | 1.617052  | 0.725303  |
| Na | 1.077865  | -0.500133 | -1.711739 |
| Na | 2.135282  | 0.292518  | 1.650488  |

Na3K6  
energy = -5.007076813 eV

|    |           |           |           |
|----|-----------|-----------|-----------|
| K  | -0.836505 | -1.549116 | -3.985066 |
| K  | 2.392710  | 1.425988  | -2.411452 |
| K  | -2.716084 | -2.685028 | 0.113125  |
| K  | 0.745426  | 3.259108  | 1.547974  |
| K  | 3.832265  | 0.045709  | 1.573202  |
| K  | -3.447852 | 1.356826  | 2.291616  |
| Na | -1.189559 | 0.855655  | -0.891055 |
| Na | 1.240587  | -2.056540 | -0.635365 |
| Na | -0.020988 | -0.652602 | 2.397022  |

Na3K7  
energy = -5.717855025 eV

|    |           |           |           |
|----|-----------|-----------|-----------|
| K  | -2.375612 | -2.775682 | -1.042721 |
| K  | -2.049630 | -0.235817 | 3.190410  |
| K  | -0.745165 | 0.786414  | -3.746048 |
| K  | -0.369496 | 3.713297  | 1.132063  |
| K  | 2.262828  | -2.424820 | -2.050998 |
| K  | 2.638525  | 0.502090  | 2.827172  |
| K  | 3.076753  | 2.093797  | -1.493244 |
| Na | -3.220902 | 1.223224  | -0.485884 |
| Na | 0.096302  | 0.065536  | -0.046724 |
| Na | 0.686396  | -2.948039 | 1.715975  |

Na3K8  
energy = -6.460758579 eV

|    |           |           |           |
|----|-----------|-----------|-----------|
| K  | -1.426865 | -1.249286 | -3.472613 |
| K  | 2.145669  | 2.083785  | -2.590281 |
| K  | -2.226167 | 2.823344  | -1.651802 |
| K  | 0.119649  | -3.933940 | 0.407150  |
| K  | -3.658783 | -1.431888 | 0.467695  |
| K  | 3.692163  | -0.600657 | 1.289455  |
| K  | 1.393427  | 3.281973  | 1.715397  |
| K  | -0.039068 | -0.973252 | 3.834954  |
| Na | 2.317344  | -1.892619 | -2.233269 |
| Na | 0.000002  | -0.000020 | -0.000003 |
| Na | -2.317370 | 1.892562  | 2.233318  |

Na3K9  
energy = -7.163203889 eV

|    |           |           |           |
|----|-----------|-----------|-----------|
| K  | 1.457454  | 0.956146  | -3.695073 |
| K  | -2.018441 | -1.788382 | -3.446280 |
| K  | -2.626500 | 2.576078  | -2.162993 |
| K  | 1.505061  | -3.285821 | -1.210915 |
| K  | 1.210249  | 3.803592  | -0.092596 |
| K  | -4.257319 | -0.986516 | 0.227249  |
| K  | -2.300079 | 2.301871  | 2.470424  |
| K  | 3.497802  | -2.466211 | 2.670027  |
| K  | -0.938950 | -2.410572 | 2.799182  |
| Na | 3.323931  | 0.297634  | -0.216128 |

|    |           |          |           |
|----|-----------|----------|-----------|
| Na | -0.307294 | 0.034885 | -0.194888 |
| Na | 1.454085  | 0.967295 | 2.851991  |

Na3K10  
energy = -7.976477243 eV

|    |           |           |           |
|----|-----------|-----------|-----------|
| K  | -3.442372 | -0.504841 | -2.408044 |
| K  | -3.400039 | -1.691781 | 1.865804  |
| K  | -0.878533 | -3.961766 | -1.091573 |
| K  | -0.864486 | 3.100358  | -2.809044 |
| K  | -0.796812 | 1.203573  | 4.020791  |
| K  | 0.702684  | -0.942144 | -4.022266 |
| K  | 0.771732  | -2.877628 | 2.946829  |
| K  | 3.308318  | 1.929383  | -1.798891 |
| K  | 3.348617  | -2.437521 | -0.710130 |
| K  | 3.350665  | 0.742439  | 2.474943  |
| Na | -2.785195 | 2.142884  | 0.622713  |
| Na | 0.032968  | -0.085412 | -0.024037 |
| Na | 0.652453  | 3.382455  | 0.932905  |

Na3K11  
energy = -8.631936599 eV

|    |           |           |           |
|----|-----------|-----------|-----------|
| Na | -3.081597 | 0.545323  | 0.442569  |
| Na | -0.100877 | 1.099120  | 2.961633  |
| Na | 0.353068  | -0.139281 | -0.387155 |
| K  | -3.788651 | 1.363821  | 4.183159  |
| K  | -2.753569 | -2.702816 | -1.834104 |
| K  | -2.285500 | 1.532383  | -3.326109 |
| K  | -1.681725 | -2.585671 | 2.558358  |
| K  | -0.987479 | 3.936754  | 0.302996  |
| K  | 0.877835  | -1.530928 | -4.214707 |
| K  | 1.238818  | -4.157566 | -0.551858 |
| K  | 1.976571  | 2.665796  | -2.924854 |
| K  | 2.742666  | -1.681648 | 2.810874  |
| K  | 3.217592  | 2.554848  | 1.324682  |
| K  | 4.272847  | -0.900135 | -1.345484 |

Na3K12  
energy = -9.323776487 eV

|    |           |           |           |
|----|-----------|-----------|-----------|
| Na | -2.121640 | -2.211406 | 0.709262  |
| Na | -0.406404 | -1.125561 | -2.450939 |
| Na | 0.021745  | 0.709813  | 0.551917  |
| K  | -3.836700 | 0.610795  | -1.607073 |
| K  | -3.547179 | 0.846741  | 2.877512  |
| K  | -2.071794 | 4.249670  | 0.425858  |
| K  | -1.713968 | -4.835604 | -2.220271 |
| K  | -0.131583 | 2.718425  | -3.276272 |
| K  | -0.022127 | -1.631255 | 4.094257  |
| K  | 0.311852  | 2.865662  | 4.018307  |
| K  | 1.793191  | -3.248420 | 0.356710  |
| K  | 2.237378  | -3.520111 | -4.104637 |
| K  | 2.421270  | 4.024792  | 0.209536  |
| K  | 3.403361  | 0.265104  | -2.012102 |
| K  | 3.662598  | 0.281356  | 2.427934  |

Na4K1  
energy = -2.447552508 eV

|    |           |           |           |
|----|-----------|-----------|-----------|
| Na | -1.705645 | -0.931848 | -0.827346 |
| Na | 0.015198  | 0.535274  | 2.043359  |
| Na | 0.889964  | -2.715430 | 0.854274  |
| Na | 1.782178  | 0.116689  | -1.127961 |
| K  | -0.981695 | 2.995315  | -0.942326 |

Na4K2  
energy = -3.108314107 eV

|    |           |           |           |
|----|-----------|-----------|-----------|
| Na | -1.336809 | 0.669776  | -2.027967 |
| Na | 2.004442  | -0.432338 | -1.464087 |
| Na | -2.004436 | 0.432348  | 1.464091  |
| Na | 1.336802  | -0.669786 | 2.027967  |
| K  | -0.925024 | -2.999164 | -0.380778 |
| K  | 0.925025  | 2.999164  | 0.380774  |

Na4K3  
energy = -3.747346315 eV

|    |           |           |           |
|----|-----------|-----------|-----------|
| Na | -0.350252 | 0.981346  | -1.565167 |
| Na | 0.210130  | -2.625299 | -1.786533 |
| Na | 0.416534  | -1.046816 | 1.505380  |
| Na | 2.955239  | -0.501458 | -1.069205 |
| K  | -3.269977 | -1.561133 | -0.214590 |
| K  | -2.131672 | 2.105657  | 1.923168  |
| K  | 2.169998  | 2.647703  | 1.206947  |

Na4K4  
energy = -4.418719611 eV

|    |           |           |           |
|----|-----------|-----------|-----------|
| Na | -2.296839 | -0.136117 | 0.694919  |
| Na | -0.219708 | 2.023106  | -1.278871 |
| Na | 0.956175  | -0.800862 | 2.054528  |
| Na | 1.560327  | -1.086128 | -1.470556 |
| K  | -2.052183 | -1.016210 | -3.209562 |
| K  | -0.875422 | -3.842275 | 0.126318  |
| K  | -0.466165 | 2.904614  | 2.625154  |
| K  | 3.393815  | 1.953873  | 0.458071  |

Na4K5  
energy = -5.088348274 eV

|    |           |           |           |
|----|-----------|-----------|-----------|
| Na | -2.535751 | -0.096065 | -1.592117 |
| Na | -0.982778 | 0.784576  | 1.438305  |
| Na | 0.824028  | 1.063504  | -2.250431 |
| Na | 1.877051  | -1.340707 | 0.113715  |
| K  | -1.604744 | -3.113493 | 1.112806  |
| K  | -1.530852 | 3.917393  | -0.861829 |
| K  | 0.003850  | -2.809974 | -3.089781 |
| K  | 1.412414  | -0.962987 | 4.019741  |
| K  | 2.536782  | 2.557752  | 1.109590  |

Na4K6  
energy = -5.788816947 eV

|    |           |           |           |
|----|-----------|-----------|-----------|
| Na | -0.262527 | 0.045725  | -0.087973 |
| Na | 1.008858  | -0.551093 | 3.086996  |
| Na | 2.409453  | 2.219085  | 0.347882  |
| Na | 3.147733  | -1.314283 | 0.280422  |
| K  | -3.079962 | -1.241974 | 2.206642  |
| K  | -2.935292 | -1.054258 | -2.567231 |
| K  | -1.129083 | 2.939891  | 2.396028  |
| K  | -0.824712 | 3.218802  | -2.203859 |
| K  | -0.015752 | -3.809192 | -0.070216 |
| K  | 1.681284  | -0.452703 | -3.388690 |

Na4K7  
energy = -6.537247979 eV

|   |           |           |           |
|---|-----------|-----------|-----------|
| K | -2.610801 | 0.278479  | -2.928673 |
| K | 2.224258  | 1.458403  | -2.928022 |
| K | 0.688128  | -2.849946 | -2.677172 |
| K | 3.813293  | -0.868493 | 0.683755  |
| K | -3.092333 | -2.331148 | 0.700991  |



|    |           |           |           |
|----|-----------|-----------|-----------|
| K  | 1.754020  | 3.045873  | 1.765532  |
| K  | -0.109151 | -0.439694 | 3.909345  |
| Na | -0.853481 | 3.411558  | -1.217624 |
| Na | 0.056116  | -0.032859 | -0.032802 |
| Na | 0.741206  | -3.384294 | 1.306016  |
| Na | -2.611256 | 1.712121  | 1.418653  |

Na4K8  
energy = -7.253021500 eV

|    |           |           |           |
|----|-----------|-----------|-----------|
| K  | -3.616800 | -1.585436 | 0.901281  |
| K  | -3.099361 | 2.627240  | -0.452365 |
| K  | -1.702009 | 1.403794  | 3.678405  |
| K  | -0.338963 | -3.959125 | -0.960983 |
| K  | 0.001382  | -2.660429 | 3.364562  |
| K  | 0.829277  | 4.014053  | 1.193169  |
| K  | 3.495587  | -2.347829 | 0.701843  |
| K  | 3.958176  | 1.720875  | -0.802598 |
| Na | -1.850143 | -0.572392 | -2.628766 |
| Na | 0.211114  | 0.060953  | 0.356360  |
| Na | 0.350514  | 2.332146  | -2.545479 |
| Na | 1.761227  | -1.033851 | -2.805429 |

Na4K9  
energy = -8.076577534 eV

|    |           |           |           |
|----|-----------|-----------|-----------|
| K  | -3.928827 | -1.279926 | -0.780880 |
| K  | -3.040525 | 1.573798  | 2.515229  |
| K  | -2.470171 | 2.852955  | -1.783201 |
| K  | -0.859417 | -0.727228 | -4.019133 |
| K  | -0.490686 | -4.093679 | -1.024269 |
| K  | 0.548771  | 3.938981  | 1.366318  |
| K  | 1.948718  | 2.545790  | -2.672508 |
| K  | 3.117145  | -1.769687 | -2.198902 |
| K  | 3.954608  | 1.087557  | 1.107458  |
| Na | -1.533354 | -2.190946 | 2.403545  |
| Na | -0.014667 | 0.049610  | -0.090001 |
| Na | 0.733940  | 0.451721  | 3.490819  |
| Na | 2.034464  | -2.438946 | 1.685527  |

Na4K10  
energy = -8.747981289 eV

|    |           |           |           |
|----|-----------|-----------|-----------|
| K  | -1.017231 | -2.305194 | -5.174088 |
| K  | 1.097372  | 3.288640  | -2.345672 |
| K  | 4.198967  | 0.985823  | -0.068692 |
| K  | -2.605781 | 3.433047  | 0.178811  |
| K  | 2.667126  | -3.216903 | 0.244078  |
| K  | -4.081417 | -0.789892 | 0.489606  |
| K  | 1.408520  | 3.697891  | 2.161664  |
| K  | -1.022959 | -3.126673 | 2.790170  |
| K  | 2.399131  | -0.407513 | 3.795995  |
| K  | -1.859650 | 1.124108  | 3.950889  |
| Na | 1.639330  | -0.680204 | -2.702328 |
| Na | -1.867033 | 0.580781  | -2.574763 |
| Na | -1.051447 | -2.799321 | -1.229197 |
| Na | 0.095072  | 0.215410  | 0.483526  |

Na4K11  
energy = -9.451430188 eV

|    |           |           |           |
|----|-----------|-----------|-----------|
| Na | -0.468008 | 0.493787  | -3.069362 |
| Na | 0.248724  | -2.673487 | -1.224955 |
| Na | -2.814129 | -0.766189 | -0.451033 |
| Na | 0.473577  | 0.587762  | 0.425645  |
| K  | -2.637176 | -2.550519 | -4.150711 |
| K  | 3.362166  | -0.512052 | -2.595502 |
| K  | 1.744846  | 3.692915  | -2.195953 |
| K  | -2.612980 | 3.208765  | -1.085824 |
| K  | -3.090959 | -4.813277 | -0.370768 |

|   |           |           |          |
|---|-----------|-----------|----------|
| K | 4.257474  | 1.988541  | 1.076194 |
| K | 3.255061  | -2.376430 | 1.468957 |
| K | 0.472381  | 4.345599  | 2.032492 |
| K | -0.955145 | -2.655784 | 2.765155 |
| K | -2.757179 | 1.367534  | 2.988040 |
| K | 1.521348  | 0.662835  | 4.387626 |

Na5K1  
energy = -3.187715389 eV

|    |           |           |           |
|----|-----------|-----------|-----------|
| Na | -1.228321 | -0.969300 | 1.993237  |
| Na | -0.841389 | 2.311118  | 0.609965  |
| Na | 0.990115  | -2.279699 | -0.493873 |
| Na | 1.377028  | 1.000713  | -1.877142 |
| Na | 2.074685  | 0.438258  | 1.619652  |
| K  | -2.372119 | -0.501090 | -1.851839 |

Na5K2  
energy = -3.825498732 eV

|    |           |           |           |
|----|-----------|-----------|-----------|
| Na | -0.829900 | 0.724026  | 2.919373  |
| Na | -0.603179 | 1.722581  | -0.575002 |
| Na | 0.693888  | -1.666719 | 0.634284  |
| Na | 2.370055  | 1.459657  | 1.548921  |
| Na | 2.517133  | 0.315102  | -1.816698 |
| K  | -3.344688 | -1.122071 | 0.442595  |
| K  | -0.803308 | -1.432576 | -3.153473 |

Na5K3  
energy = -4.494887300 eV

|    |           |           |           |
|----|-----------|-----------|-----------|
| Na | 0.118363  | -2.160527 | -1.467308 |
| Na | 1.924948  | 0.787851  | -0.517510 |
| Na | -2.225732 | 0.343836  | -0.318729 |
| Na | -1.482494 | -2.458874 | 1.752204  |
| Na | -0.002016 | 0.743706  | 2.506342  |
| K  | -0.375945 | 1.204418  | -3.741134 |
| K  | -0.488398 | 3.917739  | -0.028680 |
| K  | 2.531274  | -2.378148 | 1.814817  |

Na5K4  
energy = -5.175543525 eV

|    |           |           |           |
|----|-----------|-----------|-----------|
| Na | 1.110222  | 2.146031  | -1.967693 |
| Na | -0.052729 | -1.152495 | -0.610041 |
| Na | -1.643015 | 2.114635  | 0.358530  |
| Na | 1.802132  | 1.362328  | 1.481906  |
| Na | -1.027774 | -0.344096 | 2.921507  |
| K  | -2.278115 | 0.585674  | -3.408565 |
| K  | 3.817953  | -0.745464 | -1.420773 |
| K  | -3.912362 | -1.317727 | 0.328663  |
| K  | 2.183688  | -2.648888 | 2.316466  |

Na5K5  
energy = -5.876276233 eV

|    |           |           |           |
|----|-----------|-----------|-----------|
| Na | 1.153362  | 1.089569  | -2.435133 |
| Na | 1.893054  | -2.109416 | -0.812350 |
| Na | -0.941446 | 0.008272  | 0.369539  |
| Na | 2.603493  | 1.027055  | 0.927491  |
| Na | 1.319648  | -1.816636 | 2.736035  |
| K  | -1.309091 | -2.052126 | -3.245634 |
| K  | -2.920295 | 1.990568  | -2.396075 |
| K  | 0.073896  | 4.053816  | 0.141461  |
| K  | -1.559081 | -3.844868 | 0.832216  |

K -0.313540 1.653765 3.882449

Na5K6  
energy = -6.617545494 eV

|    |           |           |           |
|----|-----------|-----------|-----------|
| Na | 0.958310  | 3.331319  | -0.257603 |
| Na | -0.100061 | -0.083786 | -0.201598 |
| Na | -1.887160 | 2.538753  | 1.741806  |
| Na | 1.374225  | 1.165589  | 2.789144  |
| Na | -1.800165 | -0.850676 | 2.849303  |
| K  | 0.547859  | 1.396585  | -3.789951 |
| K  | 1.406994  | -2.858173 | -2.597941 |
| K  | -3.479482 | 1.076275  | -1.641122 |
| K  | 3.822763  | 0.395603  | -0.486882 |
| K  | -2.488887 | -3.206617 | -0.370101 |
| K  | 1.645603  | -2.904873 | 1.964946  |

Na5K7  
energy = -7.350368351 eV

|    |           |           |           |
|----|-----------|-----------|-----------|
| Na | -1.244452 | 1.652519  | -2.808715 |
| Na | -0.297567 | -0.160728 | 0.301662  |
| Na | 0.142616  | -1.730968 | -2.981207 |
| Na | 0.343173  | 3.432977  | -0.031835 |
| Na | 2.261748  | 1.107871  | -2.093530 |
| K  | -3.709625 | -1.403936 | -1.709056 |
| K  | -3.561935 | 2.398286  | 0.462597  |
| K  | -0.890653 | -4.184121 | 0.181617  |
| K  | -0.649858 | 2.014458  | 3.721919  |
| K  | 1.060191  | -2.077367 | 3.565077  |
| K  | 3.197957  | -2.461076 | -0.410326 |
| K  | 3.348405  | 1.412087  | 1.801797  |

Na5K8  
energy = -8.174838738 eV

|    |           |           |           |
|----|-----------|-----------|-----------|
| Na | -3.598264 | -0.058924 | 0.335442  |
| Na | -2.009938 | 1.491818  | -2.572514 |
| Na | -1.788493 | 3.055398  | 0.727467  |
| Na | -1.449308 | 0.432453  | 3.255123  |
| Na | 0.097439  | -0.054201 | -0.019232 |
| K  | -2.189666 | -2.565253 | -2.533857 |
| K  | -1.769089 | -3.359904 | 1.837618  |
| K  | 1.379460  | 3.576650  | -1.760734 |
| K  | 1.422699  | -0.333590 | -3.917737 |
| K  | 1.800004  | 2.781996  | 2.610741  |
| K  | 1.866106  | -3.615181 | -0.836703 |
| K  | 2.109445  | -1.631222 | 3.220766  |
| K  | 4.129606  | 0.279959  | -0.346382 |

Na5K9  
energy = -8.842706097 eV

|    |           |           |           |
|----|-----------|-----------|-----------|
| K  | -0.928798 | 1.374349  | -4.190139 |
| K  | 0.391904  | -2.910798 | -3.424034 |
| K  | 3.247471  | 0.497390  | -2.761696 |
| K  | -3.673599 | -1.581307 | -2.086761 |
| K  | 0.981864  | 3.928627  | -0.920796 |
| K  | -3.324968 | 2.646688  | -0.599834 |
| K  | 3.037268  | -2.879855 | 0.208937  |
| K  | -3.398767 | -0.775098 | 2.325977  |
| K  | 2.167340  | 1.485146  | 5.112316  |
| Na | -0.190343 | -0.085129 | -0.494033 |
| Na | -1.019454 | -3.495755 | 0.376295  |
| Na | 2.805755  | 1.027599  | 1.216597  |
| Na | -0.600472 | 2.141520  | 2.337035  |
| Na | 0.504799  | -1.373376 | 2.900134  |

Na5K10

energy = -9.577780009 eV

|    |           |           |           |
|----|-----------|-----------|-----------|
| K  | -4.120828 | -3.707762 | -0.014284 |
| K  | -3.135488 | 2.801438  | -0.782467 |
| K  | -1.717810 | -3.605578 | 3.844186  |
| K  | -0.748544 | 2.902934  | 3.050252  |
| K  | -0.283132 | 1.975435  | -4.169219 |
| K  | 1.008944  | 4.617984  | -0.750611 |
| K  | 1.339922  | -2.162151 | -3.438208 |
| K  | 3.567985  | 2.139133  | 2.014574  |
| K  | 3.726847  | -2.060717 | 0.394498  |
| K  | 3.849465  | 1.467630  | -2.436184 |
| Na | -2.485082 | -0.375959 | 1.557606  |
| Na | -2.260602 | -0.904021 | -2.119913 |
| Na | -0.167398 | -2.946553 | 0.182254  |
| Na | 0.500376  | 0.626744  | -0.328229 |
| Na | 0.925345  | -0.768556 | 2.995745  |

Na6K1  
energy = -3.902447890 eV

|    |           |           |           |
|----|-----------|-----------|-----------|
| Na | 2.508901  | -0.112237 | -1.719862 |
| Na | -0.326676 | 1.840489  | -0.575403 |
| Na | -2.996342 | -0.473137 | 0.251270  |
| Na | 0.352710  | -1.809224 | 0.653840  |
| Na | 2.429664  | 1.014036  | 1.667898  |
| Na | -0.923927 | 0.794190  | 2.868644  |
| K  | -1.044330 | -1.254118 | -3.146388 |

Na6K2  
energy = -4.571888944 eV

|    |           |           |           |
|----|-----------|-----------|-----------|
| Na | -0.722859 | 0.981664  | -3.170434 |
| Na | -0.514245 | -2.191358 | -1.408993 |
| Na | 1.947404  | 0.398502  | -0.894593 |
| Na | -3.290812 | 0.084257  | -0.837479 |
| Na | -0.781175 | 2.535390  | 0.115424  |
| Na | -1.030177 | -0.642075 | 1.810499  |
| K  | 2.319468  | -2.770634 | 1.487303  |
| K  | 2.072396  | 1.604254  | 2.898273  |

Na6K3  
energy = -5.247094708 eV

|    |           |           |           |
|----|-----------|-----------|-----------|
| Na | -0.167648 | -0.285757 | -2.712868 |
| Na | 1.811665  | 1.917519  | -0.714453 |
| Na | -2.711040 | -0.289268 | -0.189938 |
| Na | -0.090277 | -2.729879 | -0.094809 |
| Na | -0.731727 | 1.914019  | 1.808475  |
| Na | 1.889029  | -0.526599 | 1.903617  |
| K  | -1.817783 | 3.290958  | -1.827952 |
| K  | 3.479191  | -1.641949 | -1.635668 |
| K  | -1.661411 | -1.649043 | 3.463596  |

Na6K4  
energy = -5.963832453 eV

|    |           |           |           |
|----|-----------|-----------|-----------|
| Na | -0.166690 | -0.320795 | -0.993045 |
| Na | 3.113407  | 1.355588  | -0.820249 |
| Na | 0.373755  | 2.625659  | 1.205827  |
| Na | -0.055206 | -3.277298 | 1.208272  |
| Na | 2.055068  | -0.492552 | 2.085128  |
| Na | -1.566043 | -0.210572 | 2.447650  |
| K  | 0.160454  | 3.104996  | -2.912845 |
| K  | 2.989357  | -2.642984 | -1.366783 |
| K  | -3.540658 | -2.306484 | -0.543482 |

K -3.363443 2.164443 -0.310472

Na6K5  
energy = -6.696930888 eV

|    |           |           |           |
|----|-----------|-----------|-----------|
| Na | 2.312980  | 2.025260  | -1.622329 |
| Na | 3.136166  | -1.423372 | -1.140022 |
| Na | -0.123668 | -0.121887 | -0.127311 |
| Na | -3.161601 | 1.663159  | 0.640651  |
| Na | 0.113540  | 3.217633  | 1.033853  |
| Na | 2.674514  | 0.613491  | 1.886972  |
| K  | -0.200201 | -2.359628 | -3.246331 |
| K  | -1.505773 | 2.081358  | -3.021591 |
| K  | -3.252610 | -2.381705 | 0.238468  |
| K  | 1.003633  | -3.425878 | 1.632047  |
| K  | -0.996980 | 0.111570  | 3.725593  |

Na6K6  
energy = -7.447116788 eV

|    |           |           |           |
|----|-----------|-----------|-----------|
| Na | -3.015002 | 0.891366  | -0.958216 |
| Na | -2.309180 | 0.056995  | 2.520408  |
| Na | -1.000363 | 3.146890  | 1.039954  |
| Na | -0.844477 | -1.068996 | -3.135616 |
| Na | -0.099261 | 2.454158  | -2.439765 |
| Na | 0.457441  | -0.135176 | 0.145372  |
| K  | -2.700060 | -3.035191 | -0.094982 |
| K  | 0.501577  | -2.921759 | 3.057143  |
| K  | 1.317660  | 1.344543  | 3.876570  |
| K  | 1.599333  | -3.765606 | -1.181807 |
| K  | 2.994887  | 3.056378  | 0.167130  |
| K  | 3.097445  | -0.023603 | -2.996192 |

Na6K7  
energy = -8.271137256 eV

|    |           |           |           |
|----|-----------|-----------|-----------|
| Na | -1.213434 | 3.204319  | -1.019623 |
| Na | 0.032852  | -0.076149 | -0.093806 |
| Na | 1.687424  | 2.945502  | 1.206981  |
| Na | -1.619957 | 2.121451  | 2.456806  |
| Na | -2.001789 | -1.521434 | 2.541206  |
| Na | 1.202795  | 0.040573  | 3.395860  |
| K  | -1.565959 | 0.226257  | -3.843564 |
| K  | 1.976133  | -2.395918 | -2.742235 |
| K  | 2.334862  | 2.142688  | -2.740316 |
| K  | -2.164232 | -3.360037 | -1.141348 |
| K  | -4.186740 | 0.533888  | -0.218355 |
| K  | 4.144470  | -0.241647 | 0.596944  |
| K  | 1.373575  | -3.619493 | 1.601450  |

Na6K8  
energy = -8.937851898 eV

|    |           |           |           |
|----|-----------|-----------|-----------|
| Na | -1.689221 | 1.178224  | 3.041953  |
| Na | -1.397477 | -2.403205 | 2.203332  |
| Na | -0.438429 | 0.203683  | -0.232596 |
| Na | 1.521261  | -2.868434 | 0.074731  |
| Na | 1.551030  | -0.430521 | 2.856191  |
| Na | 3.146865  | 0.489458  | -0.417648 |
| K  | -4.482695 | -0.338487 | 0.491731  |
| K  | -2.650764 | 0.717665  | -3.546138 |
| K  | -2.568789 | 3.683429  | -0.088472 |
| K  | -2.043151 | -3.366987 | -1.724420 |
| K  | 1.077448  | 3.132538  | -2.689819 |
| K  | 1.463240  | -1.270473 | -3.640510 |
| K  | 1.508557  | 3.431877  | 1.801145  |
| K  | 5.002126  | -2.158768 | 1.870520  |

Na6K9

energy = -9.669610086 eV

|    |           |           |           |
|----|-----------|-----------|-----------|
| Na | -3.036110 | -1.061081 | 0.420459  |
| Na | -1.696270 | -1.272423 | -2.963568 |
| Na | -0.155853 | -0.876537 | 2.807757  |
| Na | 0.025151  | 0.740740  | -0.450721 |
| Na | 0.032976  | -2.969189 | -0.280379 |
| Na | 2.974828  | -0.924992 | 0.786522  |
| K  | -3.610160 | 2.200869  | -1.868605 |
| K  | -2.491594 | 2.360143  | 2.506118  |
| K  | -2.367382 | -4.228555 | 2.720207  |
| K  | -0.110110 | 4.750714  | -0.521896 |
| K  | 0.165977  | 2.152538  | -4.274122 |
| K  | 2.036788  | 2.478955  | 2.786795  |
| K  | 2.170230  | -4.168733 | 2.922002  |
| K  | 2.405432  | -1.583936 | -3.162098 |
| K  | 3.656098  | 2.401486  | -1.428471 |

Na7K1  
energy = -4.643042397 eV

|    |           |           |           |
|----|-----------|-----------|-----------|
| Na | -3.310533 | 0.440813  | 0.482931  |
| Na | -1.427565 | 2.430179  | -1.855641 |
| Na | -1.187998 | -1.176818 | -1.957635 |
| Na | -0.603006 | -1.615132 | 1.594077  |
| Na | -0.197525 | 1.966909  | 1.514172  |
| Na | 1.741663  | 0.862049  | -1.317898 |
| Na | 1.880123  | -2.666936 | -0.754905 |
| K  | 3.104842  | -0.241064 | 2.294898  |

Na7K2  
energy = -5.321081038 eV

|    |           |           |           |
|----|-----------|-----------|-----------|
| Na | -1.862539 | 1.476697  | 1.423991  |
| Na | -1.674151 | -2.056451 | 0.803658  |
| Na | -0.148420 | 2.098116  | -1.656368 |
| Na | 0.038863  | -1.414011 | -2.272978 |
| Na | 0.100262  | -0.626011 | 3.595772  |
| Na | 1.734434  | 1.679910  | 1.359063  |
| Na | 1.922850  | -1.853236 | 0.738738  |
| K  | -3.669116 | 0.143360  | -1.930726 |
| K  | 3.557817  | 0.551626  | -2.061150 |

Na7K3  
energy = -6.047872246 eV

|    |           |           |           |
|----|-----------|-----------|-----------|
| Na | -2.473318 | -1.068474 | -2.167086 |
| Na | 0.738529  | -0.007897 | -0.832205 |
| Na | 0.544742  | 3.382072  | 0.469040  |
| Na | -2.511103 | 1.420390  | 0.476886  |
| Na | -1.686121 | -2.040907 | 1.241883  |
| Na | 1.902207  | -2.313318 | 1.727776  |
| Na | 0.148027  | 0.663836  | 2.843936  |
| K  | -1.041904 | 2.595980  | -3.189937 |
| K  | 0.488384  | -3.824341 | -1.770959 |
| K  | 3.890556  | 1.192659  | 1.200665  |

Na7K4  
energy = -6.775147434 eV

|    |           |           |           |
|----|-----------|-----------|-----------|
| Na | -1.752437 | -0.179117 | 2.814369  |
| Na | -0.099078 | -3.235964 | 1.589647  |
| Na | -0.044853 | -0.129084 | -0.248718 |
| Na | 0.400699  | 2.715608  | 1.829084  |
| Na | 0.416597  | 3.038437  | -1.874699 |
| Na | 2.050210  | -0.507329 | 2.611542  |

|    |           |           |           |
|----|-----------|-----------|-----------|
| Na | 3.192670  | 1.342907  | -0.329755 |
| K  | -3.223128 | -2.291321 | -0.789031 |
| K  | -3.217481 | 2.205757  | -0.283172 |
| K  | -0.436197 | -0.352738 | -4.021104 |
| K  | 2.712997  | -2.607155 | -1.298164 |

Na7K5  
energy = -7.544736851 eV

|    |           |           |           |
|----|-----------|-----------|-----------|
| Na | -3.187566 | -0.960674 | 0.831676  |
| Na | -2.320172 | 0.237835  | -2.516998 |
| Na | -0.958166 | -2.893094 | -1.283643 |
| Na | -0.226933 | -2.574012 | 2.257899  |
| Na | 0.154767  | 0.467300  | 0.207325  |
| Na | 1.176537  | -0.634786 | -3.160366 |
| Na | 2.470226  | -2.372606 | -0.209308 |
| K  | -2.928114 | 3.095900  | 0.349579  |
| K  | -1.357310 | 0.985844  | 3.932755  |
| K  | 0.346768  | 3.340456  | -2.646118 |
| K  | 2.888397  | -0.073696 | 3.151578  |
| K  | 3.941565  | 1.381533  | -0.914380 |

Na7K6  
energy = -8.368195866 eV

|    |           |           |           |
|----|-----------|-----------|-----------|
| Na | -2.730437 | -1.248746 | -1.964918 |
| Na | -2.248920 | 2.359258  | -1.500602 |
| Na | -0.001062 | -0.017440 | 0.136561  |
| Na | 0.028273  | 0.461789  | -3.617751 |
| Na | 0.580369  | -2.821360 | -2.139769 |
| Na | 1.359495  | 3.016516  | -1.388517 |
| Na | 3.108092  | -0.185295 | -1.783550 |
| K  | -3.806087 | 0.293401  | 1.667099  |
| K  | -1.662508 | -3.631615 | 1.182833  |
| K  | -0.707425 | 3.524942  | 2.103797  |
| K  | -0.032007 | -0.522723 | 4.095124  |
| K  | 2.760969  | -2.825858 | 1.320270  |
| K  | 3.351247  | 1.597131  | 1.889423  |

Na7K7  
energy = -9.031549416 eV

|    |           |           |           |
|----|-----------|-----------|-----------|
| Na | -2.835932 | 1.067232  | -1.806671 |
| Na | -2.563248 | -2.079136 | -0.034205 |
| Na | -2.419006 | 1.150852  | 1.805268  |
| Na | -0.808523 | -1.700692 | -3.163761 |
| Na | -0.124322 | -1.693679 | 2.747913  |
| Na | 0.399461  | 0.226077  | -0.290162 |
| Na | 0.787264  | -3.424117 | -0.318282 |
| K  | -3.965069 | -1.972487 | 3.699919  |
| K  | -0.708736 | 4.207222  | -0.196135 |
| K  | 0.502961  | 2.081339  | -3.956409 |
| K  | 1.221461  | 2.082566  | 3.310816  |
| K  | 3.240015  | -1.311568 | -2.832027 |
| K  | 3.543416  | 2.661766  | -0.593676 |
| K  | 3.730258  | -1.295378 | 1.627412  |

Na7K8  
energy = -9.762353254 eV

|    |           |           |           |
|----|-----------|-----------|-----------|
| Na | 1.319333  | 0.823444  | -2.580994 |
| Na | -0.552469 | -2.343665 | -2.148343 |
| Na | -2.294718 | 0.917592  | -1.576603 |
| Na | 2.885409  | -2.002811 | -0.988290 |
| Na | 0.191680  | 3.221251  | 0.007505  |
| Na | 3.343342  | 1.421681  | 0.338361  |
| Na | 0.142001  | -0.326133 | 0.792817  |
| K  | -1.452514 | -0.183699 | -5.350713 |
| K  | -0.891350 | 4.012980  | -3.724887 |

|   |           |           |          |
|---|-----------|-----------|----------|
| K | -3.546332 | -2.218012 | 0.595631 |
| K | 0.359816  | -4.434984 | 1.177726 |
| K | -2.982709 | 1.997025  | 2.228478 |
| K | 3.306508  | -1.629010 | 3.063680 |
| K | 1.259869  | 2.295793  | 3.785220 |
| K | -1.087866 | -1.551451 | 4.380412 |

Na8K1  
energy = -5.394717914 eV

|    |           |           |           |
|----|-----------|-----------|-----------|
| Na | 0.729003  | 0.566560  | -2.651945 |
| Na | 0.505084  | -2.970827 | -2.002598 |
| Na | -2.277640 | -0.814725 | -1.232719 |
| Na | 2.422537  | 2.673921  | -0.269564 |
| Na | -1.172969 | 2.437262  | -0.234304 |
| Na | 2.656447  | -0.909880 | 0.024468  |
| Na | -0.362783 | -2.281524 | 1.426214  |
| Na | 0.741902  | 0.970462  | 2.424626  |
| K  | -3.241581 | 0.328753  | 2.515823  |

Na8K2  
energy = -6.116100768 eV

|    |           |           |           |
|----|-----------|-----------|-----------|
| Na | -2.731422 | -0.812512 | 0.351370  |
| Na | -1.400852 | 2.385121  | -0.770137 |
| Na | -1.342508 | 1.527099  | 2.761270  |
| Na | -0.883502 | -0.599169 | -2.756545 |
| Na | -0.316191 | -3.400354 | -0.504712 |
| Na | 0.998176  | -0.204461 | 0.601298  |
| Na | 1.837886  | 1.776332  | -2.320326 |
| Na | 2.512693  | -1.802898 | -2.159321 |
| K  | -0.579763 | -2.420841 | 3.445925  |
| K  | 1.905482  | 3.551684  | 1.351179  |

Na8K4  
energy = -7.626902964 eV

|    |           |           |           |
|----|-----------|-----------|-----------|
| Na | 0.374800  | 0.071543  | -3.262009 |
| Na | -2.775470 | 1.038534  | -1.695910 |
| Na | -1.654584 | -2.486687 | -1.680474 |
| Na | 0.178199  | 3.166793  | -1.366471 |
| Na | 2.016046  | -2.469710 | -1.222319 |
| Na | 3.122224  | 1.011238  | -1.075494 |
| Na | -0.073349 | -0.032763 | 0.499406  |
| Na | 1.789868  | 2.699418  | 1.888153  |
| K  | -3.786887 | -1.175644 | 1.582262  |
| K  | -2.253535 | 3.009086  | 1.925427  |
| K  | -0.203563 | -3.799332 | 1.936445  |
| K  | 3.266251  | -1.032476 | 2.470984  |

Na8K5  
energy = -8.457021522 eV

|    |           |           |           |
|----|-----------|-----------|-----------|
| Na | -3.039288 | -0.760476 | 1.719108  |
| Na | -2.481822 | 2.583863  | 0.240444  |
| Na | -0.575457 | 1.586350  | 3.169532  |
| Na | -0.299400 | 2.308984  | -2.713246 |
| Na | -0.000449 | -0.123223 | -0.041675 |
| Na | 1.062488  | 3.431082  | 0.476953  |
| Na | 2.824203  | 0.674587  | 2.086072  |
| Na | 3.018791  | 1.125856  | -1.581354 |
| K  | -3.403090 | -0.367524 | -2.371095 |
| K  | -1.321460 | -3.879766 | -0.461200 |
| K  | 0.368469  | -2.340989 | 3.423761  |
| K  | 0.740271  | -1.500270 | -3.791630 |
| K  | 3.106744  | -2.738477 | -0.155669 |



Na8K6  
energy = -9.122404771 eV

|    |           |           |           |
|----|-----------|-----------|-----------|
| Na | 0.344693  | 2.580377  | -2.926044 |
| Na | -2.823259 | 0.826368  | -2.211696 |
| Na | 0.234750  | -0.038843 | -0.443000 |
| Na | -1.472594 | 3.247511  | 0.186892  |
| Na | 2.180999  | 2.953618  | 0.253805  |
| Na | -2.945137 | 0.148556  | 1.361877  |
| Na | -0.152356 | -2.281657 | 2.277968  |
| Na | 0.161454  | 1.469151  | 2.892422  |
| K  | -0.030865 | -1.293260 | -4.296602 |
| K  | 3.759175  | 0.317845  | -2.429319 |
| K  | -2.507431 | -3.105913 | -0.948148 |
| K  | 2.004278  | -3.620997 | -0.943836 |
| K  | 3.527100  | -0.540679 | 2.024941  |
| K  | -2.280809 | -0.662078 | 5.200738  |

Na8K7  
energy = -9.850654030 eV

|    |           |           |           |
|----|-----------|-----------|-----------|
| Na | -0.548910 | 0.595660  | -2.880977 |
| Na | 2.024746  | -1.887280 | -2.392266 |
| Na | -1.501550 | -2.743939 | -1.897505 |
| Na | 2.606188  | 1.507881  | -1.160274 |
| Na | -3.206879 | 0.095661  | -0.344647 |
| Na | -0.677124 | 2.868956  | 0.141430  |
| Na | 1.044508  | -4.037466 | 0.453941  |
| Na | 0.216760  | -0.569586 | 0.558646  |
| K  | 0.838053  | 4.371756  | -3.263168 |
| K  | -3.533778 | 3.309599  | -2.649825 |
| K  | 4.237562  | -1.506910 | 1.005713  |
| K  | -2.678869 | -3.187137 | 1.976146  |
| K  | 2.246446  | 2.160247  | 2.836587  |
| K  | -2.153703 | 1.091312  | 3.453964  |
| K  | 1.086549  | -2.068754 | 4.162233  |

Na9K1  
energy = -6.183398359 eV

|    |           |           |           |
|----|-----------|-----------|-----------|
| Na | -3.414466 | -1.511922 | 0.558667  |
| Na | -1.920803 | 1.135416  | 2.595883  |
| Na | -0.839400 | 0.485837  | -0.792708 |
| Na | -0.716145 | -3.089159 | -1.343593 |
| Na | -0.156738 | -2.009597 | 2.095486  |
| Na | 0.951811  | -0.723416 | -3.581529 |
| Na | 1.671393  | 1.115732  | 1.975182  |
| Na | 2.404076  | 1.916411  | -1.505001 |
| Na | 2.438477  | -1.540938 | -0.365333 |
| K  | -0.418204 | 4.221634  | 0.362945  |

Na9K2  
energy = -6.925363903 eV

|    |           |           |           |
|----|-----------|-----------|-----------|
| Na | -2.734324 | 1.066446  | -1.133229 |
| Na | -2.376686 | -1.506706 | 1.406831  |
| Na | -1.428070 | 1.982438  | 2.209319  |
| Na | -1.295067 | -2.217006 | -2.063552 |
| Na | 0.037177  | 3.467868  | -0.833998 |
| Na | 0.118575  | 0.896403  | -3.450445 |
| Na | 0.621402  | 0.053530  | -0.033263 |
| Na | 0.634684  | -0.831517 | 3.410123  |
| Na | 0.716167  | -3.402977 | 0.793664  |
| K  | 2.784048  | 2.424984  | 2.064668  |
| K  | 2.922093  | -1.933465 | -2.370119 |

Na9K3  
energy = -7.706809531 eV

|    |           |           |           |
|----|-----------|-----------|-----------|
| Na | -2.542636 | -2.198640 | 0.754098  |
| Na | -2.214171 | 1.132199  | 2.321846  |
| Na | -1.459302 | -2.071039 | -2.762811 |
| Na | -0.056668 | 0.222160  | -0.410111 |
| Na | 0.303574  | -1.478461 | 2.897739  |
| Na | 0.840439  | -3.323812 | -0.213142 |
| Na | 1.383610  | 1.965840  | 2.467549  |
| Na | 2.739990  | 2.383084  | -0.930193 |
| Na | 3.239995  | -0.778653 | 0.834038  |
| K  | -3.813747 | 0.993049  | -1.503225 |
| K  | -0.862805 | 4.123065  | -0.215402 |
| K  | 2.441722  | -0.968793 | -3.240384 |

Na9K4  
energy = -8.546958839 eV

|    |           |           |           |
|----|-----------|-----------|-----------|
| Na | -1.398843 | -3.185913 | 0.825360  |
| Na | -0.114226 | 0.058865  | 0.004424  |
| Na | -0.111554 | -0.886298 | 3.462650  |
| Na | 0.444955  | 0.714481  | -3.475560 |
| Na | 0.757715  | -2.743607 | -2.163273 |
| Na | 1.732248  | 3.014068  | -0.838259 |
| Na | 2.197615  | -2.592377 | 1.187740  |
| Na | 2.802298  | 0.908767  | 2.025462  |
| Na | 3.307341  | -0.244892 | -1.400828 |
| K  | -3.735732 | 0.087776  | 1.746902  |
| K  | -3.024660 | -1.325467 | -2.498695 |
| K  | -2.338730 | 3.043009  | -1.511767 |
| K  | -0.518428 | 3.151589  | 2.635844  |

Na9K5  
energy = -9.209814081 eV

|    |           |           |           |
|----|-----------|-----------|-----------|
| Na | -2.971319 | 0.933896  | 0.962185  |
| Na | -2.238308 | -2.614789 | 0.760069  |
| Na | -2.142149 | -0.642625 | -2.339211 |
| Na | -0.922399 | -0.605866 | 3.533683  |
| Na | -0.737381 | 2.834694  | -1.376343 |
| Na | -0.082343 | 2.722123  | 2.237852  |
| Na | 0.427762  | -0.197809 | 0.090256  |
| Na | 1.232193  | -3.126484 | 1.994133  |
| Na | 2.585333  | 0.223130  | 2.921633  |
| K  | -4.567518 | 2.493852  | -2.342586 |
| K  | 0.529186  | -3.706970 | -2.031861 |
| K  | 1.546238  | 0.409286  | -3.733971 |
| K  | 3.172103  | 2.835395  | -0.220312 |
| K  | 4.168603  | -1.557834 | -0.455526 |

Na9K6  
energy = -9.939806952 eV

|    |           |           |           |
|----|-----------|-----------|-----------|
| Na | -2.279469 | 1.856437  | 0.215936  |
| Na | -2.265179 | -1.909712 | -0.272188 |
| Na | -1.164012 | -0.498031 | 2.982745  |
| Na | -1.062480 | 0.274145  | -3.047997 |
| Na | 0.577548  | -3.306862 | 1.485348  |
| Na | 0.653663  | -2.864735 | -2.165163 |
| Na | 0.800932  | 0.101396  | -0.010994 |
| Na | 2.490634  | -0.592841 | 3.090210  |
| Na | 3.642665  | -2.081731 | -0.108714 |
| K  | -5.044733 | -0.300599 | 2.177346  |
| K  | -4.964893 | 0.284643  | -2.323990 |
| K  | 0.604314  | 3.116718  | 2.774935  |
| K  | 0.693409  | 3.746580  | -1.769545 |

|   |          |          |           |
|---|----------|----------|-----------|
| K | 2.993000 | 0.202570 | -3.481474 |
| K | 4.324600 | 1.972021 | 0.453544  |

Na10K1  
energy = -6.985398097 eV

|    |           |           |           |
|----|-----------|-----------|-----------|
| Na | -3.433507 | -0.590470 | -0.773898 |
| Na | -1.715743 | -1.330844 | 2.426555  |
| Na | -0.867199 | -0.459365 | -3.423616 |
| Na | -0.626141 | -2.929327 | -0.701166 |
| Na | -0.191706 | 0.718343  | -0.148025 |
| Na | 0.723839  | 1.343239  | 3.226203  |
| Na | 1.575922  | 2.236915  | -2.719347 |
| Na | 1.860505  | -1.772658 | 1.691365  |
| Na | 2.398090  | -1.252810 | -1.886711 |
| Na | 3.217446  | 1.440704  | 0.506531  |
| K  | -2.941506 | 2.596273  | 1.802109  |

Na10K2  
energy = -7.783977397 eV

|    |           |           |           |
|----|-----------|-----------|-----------|
| Na | -0.909671 | -1.228074 | -3.052628 |
| Na | -0.018310 | 2.365112  | -2.860510 |
| Na | -3.051707 | 1.121962  | -1.184371 |
| Na | 1.029601  | -3.213786 | -0.622648 |
| Na | 0.334559  | 0.282089  | -0.015737 |
| Na | -2.392642 | -2.194012 | 0.176044  |
| Na | -0.877863 | 3.571906  | 0.497444  |
| Na | 3.366153  | -1.088921 | 1.252984  |
| Na | -2.307133 | 0.733939  | 2.406797  |
| Na | 0.154929  | -1.985754 | 2.794462  |
| K  | 3.117063  | -0.278756 | -2.747066 |
| K  | 1.555021  | 1.914295  | 3.355228  |

Na10K3  
energy = -8.633567155 eV

|    |           |           |           |
|----|-----------|-----------|-----------|
| Na | -3.037767 | 1.782955  | -0.579278 |
| Na | -2.265681 | -1.414170 | -2.372218 |
| Na | -0.414344 | 1.661775  | -3.144547 |
| Na | -0.073493 | -3.561865 | -0.224168 |
| Na | -0.050229 | -0.021209 | 0.099973  |
| Na | 0.217326  | 3.564929  | -0.068122 |
| Na | 1.361480  | -1.540190 | -2.931817 |
| Na | 2.450735  | 1.499925  | 2.118170  |
| Na | 2.873696  | 1.492214  | -1.528575 |
| Na | 3.133169  | -1.692570 | 0.281170  |
| K  | -3.385353 | -1.775680 | 1.533321  |
| K  | -1.507431 | 1.990105  | 3.275950  |
| K  | 0.697892  | -1.986219 | 3.540139  |

Na10K4  
energy = -9.296264810 eV

|    |           |           |           |
|----|-----------|-----------|-----------|
| Na | -3.209226 | -0.257258 | -0.327077 |
| Na | -1.794998 | 0.840178  | 2.915300  |
| Na | -1.037049 | -2.532113 | 1.743438  |
| Na | -0.490047 | -2.519192 | -1.982447 |
| Na | 0.254906  | 0.387198  | -0.023797 |
| Na | 1.242509  | 2.940329  | 2.248636  |
| Na | 1.600046  | -0.557314 | 3.274576  |
| Na | 2.320176  | -2.641970 | 0.324540  |
| Na | 2.494153  | -0.473618 | -2.666658 |
| Na | 3.782447  | 0.721767  | 0.622344  |
| K  | -3.818905 | -4.164861 | -0.600546 |
| K  | -2.124635 | 3.672155  | -0.036870 |

|   |           |          |           |
|---|-----------|----------|-----------|
| K | -1.273656 | 1.048590 | -3.704360 |
| K | 2.054279  | 3.536110 | -1.787080 |

Na10K5  
energy = -10.02627361 eV

|    |           |           |           |
|----|-----------|-----------|-----------|
| Na | -2.977800 | -0.627306 | -2.617686 |
| Na | -1.719495 | 2.509669  | -1.147272 |
| Na | -0.335709 | -0.665335 | -0.214488 |
| Na | -0.334016 | 1.741550  | 2.360767  |
| Na | -0.053333 | -2.899972 | -3.026749 |
| Na | 0.327508  | 0.712668  | -3.575196 |
| Na | 1.365029  | -3.762185 | 0.309355  |
| Na | 1.971343  | 2.109438  | -0.665657 |
| Na | 2.638614  | -0.636208 | 1.790059  |
| Na | 2.956523  | -1.185081 | -1.803243 |
| K  | -3.972865 | 0.244194  | 1.346696  |
| K  | -2.745761 | -3.896810 | -0.099668 |
| K  | -0.690861 | -2.124896 | 3.558712  |
| K  | 0.168804  | 5.407092  | 0.802577  |
| K  | 3.402021  | 3.073183  | 2.981791  |

Na11K1  
energy = -7.857896486 eV

|    |           |           |           |
|----|-----------|-----------|-----------|
| Na | -3.421991 | 0.336075  | -0.013956 |
| Na | -1.747471 | -2.862518 | 0.684346  |
| Na | -1.686892 | -0.192401 | 3.255529  |
| Na | -1.480347 | 3.055938  | 1.506812  |
| Na | -1.402687 | -1.263398 | -2.626736 |
| Na | -1.161182 | 2.384184  | -2.152131 |
| Na | 0.190756  | 0.185785  | 0.314335  |
| Na | 1.359287  | -2.209090 | 2.598755  |
| Na | 1.483230  | -2.911194 | -1.071518 |
| Na | 1.904094  | 0.354981  | -2.812965 |
| Na | 3.676470  | -0.357900 | 0.395095  |
| K  | 2.286734  | 3.479539  | -0.077564 |

Na11K2  
energy = -8.716421805 eV

|    |           |           |           |
|----|-----------|-----------|-----------|
| Na | -3.547876 | -0.131445 | -0.336212 |
| Na | -1.960980 | 1.821972  | 2.367319  |
| Na | -1.828168 | -1.873941 | 2.416979  |
| Na | -1.682830 | 2.927929  | -1.145888 |
| Na | -1.447236 | -3.048483 | -1.143629 |
| Na | -1.353963 | -0.049700 | -3.306601 |
| Na | 0.066003  | -0.035290 | 0.018710  |
| Na | 1.193626  | 0.159953  | 3.353905  |
| Na | 1.240132  | 3.159216  | 1.084935  |
| Na | 1.621067  | 1.984660  | -2.475665 |
| Na | 1.819919  | -1.771084 | -2.500023 |
| K  | 1.798133  | -3.445236 | 1.328852  |
| K  | 4.082173  | 0.301448  | 0.337317  |

Na11K3  
energy = -9.379491811 eV

|    |           |           |           |
|----|-----------|-----------|-----------|
| Na | -2.619002 | -2.272267 | -1.230609 |
| Na | -1.056065 | 2.318369  | 2.654550  |
| Na | -0.708774 | 0.235022  | -3.154910 |
| Na | -0.329144 | -3.618509 | 1.400233  |
| Na | -0.196028 | -0.212865 | 0.330382  |
| Na | 0.285901  | 3.156527  | -0.682383 |
| Na | 0.616884  | -0.839778 | 3.751904  |
| Na | 1.004719  | -2.764977 | -1.949864 |
| Na | 2.518492  | 1.681255  | 1.813022  |
| Na | 2.754100  | 0.448793  | -1.638265 |

|    |           |           |           |
|----|-----------|-----------|-----------|
| Na | 2.924210  | -1.933907 | 1.108741  |
| K  | -3.541486 | 1.811333  | -0.715516 |
| K  | -3.342050 | -1.145862 | 2.698346  |
| K  | 1.688242  | 3.136864  | -4.385631 |

Na11K4  
energy = -10.10903194 eV

|    |           |           |           |
|----|-----------|-----------|-----------|
| Na | -1.159849 | -0.022813 | -3.467444 |
| Na | 2.306246  | 1.222939  | -3.048975 |
| Na | 1.634680  | -2.396540 | -3.031498 |
| Na | -0.529781 | 2.906211  | -1.364171 |
| Na | -1.582291 | -3.016737 | -1.328438 |
| Na | 4.043518  | -0.983683 | -0.578164 |
| Na | -2.952392 | 0.199447  | -0.303881 |
| Na | 0.597220  | -0.284360 | -0.280032 |
| Na | 1.618969  | -3.647462 | 0.430735  |
| Na | -1.231697 | -2.067882 | 2.189645  |
| Na | -0.553815 | 1.741984  | 2.328718  |
| K  | 3.002471  | 2.864634  | 0.665394  |
| K  | -3.579457 | 3.983714  | 0.936391  |
| K  | 2.483680  | -0.811493 | 3.291873  |
| K  | -4.097502 | 0.312041  | 3.559848  |

Na12K1  
energy = -8.801078783 eV

|    |           |           |           |
|----|-----------|-----------|-----------|
| Na | -0.055139 | -0.917128 | -3.432993 |
| Na | 0.323864  | 2.674062  | -2.318228 |
| Na | -2.899758 | 0.885819  | -1.867775 |
| Na | -2.191990 | -2.646073 | -0.935600 |
| Na | 1.487058  | -3.130512 | -0.786214 |
| Na | 0.036841  | 0.002202  | -0.019622 |
| Na | -1.588261 | 3.074630  | 0.840222  |
| Na | 2.100277  | 2.680137  | 1.017508  |
| Na | -3.132012 | -0.187338 | 1.668287  |
| Na | 2.819197  | -0.907269 | 1.964328  |
| Na | -0.443035 | -2.640099 | 2.348498  |
| Na | -0.069926 | 0.895490  | 3.446020  |
| K  | 3.612884  | 0.216080  | -1.924431 |

Na12K2  
energy = -9.464138255 eV

|    |           |           |           |
|----|-----------|-----------|-----------|
| Na | 1.572272  | 0.357245  | -3.303197 |
| Na | -2.062479 | 1.253920  | -3.046101 |
| Na | -0.972003 | -2.302118 | -2.985672 |
| Na | 2.191428  | -2.554767 | -1.032574 |
| Na | -3.656012 | -1.145861 | -0.692381 |
| Na | -0.264956 | -0.046168 | -0.286802 |
| Na | 3.131367  | 0.833479  | 0.026343  |
| Na | -2.855214 | 2.264609  | 0.479737  |
| Na | -1.060667 | -3.476876 | 0.511649  |
| Na | 1.408263  | -1.589048 | 2.449398  |
| Na | 0.260467  | 2.070276  | 2.479328  |
| Na | -2.166694 | -0.677271 | 2.691116  |
| K  | 0.622188  | 3.811233  | -1.193416 |
| K  | 3.852040  | 1.201348  | 3.902573  |

Na12K3  
energy = -10.19159701 eV

|    |           |           |           |
|----|-----------|-----------|-----------|
| Na | -3.610841 | 0.576175  | -0.119752 |
| Na | -2.635747 | -3.017647 | 0.136009  |
| Na | -2.614044 | -0.875200 | 3.147296  |
| Na | -1.496607 | -0.953102 | -2.726066 |
| Na | -1.427980 | 2.507708  | 2.216910  |
| Na | -0.774092 | 2.520114  | -1.371968 |
| Na | -0.213546 | -0.436479 | 0.514481  |

|    |          |           |           |
|----|----------|-----------|-----------|
| Na | 0.182718 | -3.279373 | 2.592413  |
| Na | 0.865432 | 0.111021  | 3.908281  |
| Na | 2.081750 | 2.214648  | 1.163631  |
| Na | 2.216724 | 0.080611  | -1.966414 |
| Na | 3.136894 | -1.323736 | 1.325075  |
| K  | 0.315183 | 1.605062  | -5.151302 |
| K  | 1.143740 | -3.779574 | -1.393642 |
| K  | 2.830415 | 4.049772  | -2.274951 |

Na13K1  
energy = -9.547385798 eV

|    |           |           |           |
|----|-----------|-----------|-----------|
| Na | -0.744698 | 0.598979  | -3.089418 |
| Na | 2.763952  | -0.249228 | -2.397682 |
| Na | 0.076307  | -2.848961 | -2.035937 |
| Na | 1.328188  | 3.009818  | -1.201793 |
| Na | -2.915724 | -1.302413 | -0.510090 |
| Na | -2.114659 | 2.446554  | 0.023686  |
| Na | 0.329359  | -0.099414 | 0.203943  |
| Na | 2.840936  | -2.601885 | 0.473147  |
| Na | 3.613706  | 1.014615  | 0.988045  |
| Na | -0.630184 | -3.221893 | 1.634847  |
| Na | 0.622224  | 2.639264  | 2.469330  |
| Na | -2.064545 | 0.038357  | 2.829092  |
| Na | 1.519443  | -0.819603 | 3.476235  |
| K  | -4.624304 | 1.395809  | -2.863405 |

Na13K2  
energy = -10.28785981 eV

|    |           |           |           |
|----|-----------|-----------|-----------|
| Na | -3.409545 | -1.776077 | -0.149760 |
| Na | -3.312941 | 1.364409  | 1.401461  |
| Na | -2.900753 | 1.190323  | -2.229435 |
| Na | -1.306434 | -1.793230 | -3.143121 |
| Na | -1.139260 | 3.646281  | -0.456412 |
| Na | -0.551589 | -3.803218 | -0.181076 |
| Na | -0.358500 | 2.477837  | 2.921267  |
| Na | -0.000003 | -0.000006 | 0.000005  |
| Na | 2.049356  | -2.320854 | -2.283747 |
| Na | 2.216542  | 3.118693  | 0.402925  |
| Na | 2.402892  | -2.689903 | 1.338738  |
| Na | 2.499403  | 0.450624  | 2.889880  |
| Na | 3.810834  | 0.135121  | -0.510723 |
| K  | -1.123895 | -1.636824 | 3.383893  |
| K  | 1.123894  | 1.636823  | -3.383894 |

Na14K1  
energy = -10.36654959 eV

|    |           |           |           |
|----|-----------|-----------|-----------|
| Na | -3.652128 | 0.924729  | -0.682550 |
| Na | -2.945791 | -1.689418 | 1.796906  |
| Na | -2.512722 | -2.454360 | -1.556516 |
| Na | -2.308534 | 1.873684  | 2.412160  |
| Na | -1.550303 | 0.534262  | -3.459753 |
| Na | -0.210889 | -0.828584 | 3.745579  |
| Na | -0.011143 | 0.079924  | -0.019673 |
| Na | 0.449239  | -3.222547 | 0.793111  |
| Na | 0.655172  | -2.358438 | -2.961257 |
| Na | 1.136795  | 2.432116  | 2.729735  |
| Na | 1.895044  | 1.092679  | -3.142271 |
| Na | 2.957055  | -0.732660 | 2.340914  |
| Na | 3.238550  | 2.041608  | -0.047513 |
| Na | 3.390032  | -1.497610 | -1.012508 |
| K  | -0.530375 | 3.804616  | -0.936364 |

## Part II

Structures obtained at the MP2 level (frozen core)

## K6-mp2-Def2-SVP

energy = -3594.5232852378 hartree

|   |      |               |               |               |
|---|------|---------------|---------------|---------------|
| K | 19.0 | -2.1864638363 | -0.0398993954 | -0.6096499645 |
| K | 19.0 | -1.0402503788 | -0.4771037752 | 3.7618815405  |
| K | 19.0 | -0.1942345530 | 3.9024068659  | 0.4412201821  |
| K | 19.0 | 0.1942314077  | -3.9024042538 | -0.4412218830 |
| K | 19.0 | 1.0402537174  | 0.4771011868  | -3.7618819177 |
| K | 19.0 | 2.1864636429  | 0.0399003718  | 0.6096500426  |

## K8-mp2-Def2-SVP

energy = -4792.7298314717 hartree

|   |      |               |               |               |
|---|------|---------------|---------------|---------------|
| K | 19.0 | -4.0038466434 | -0.5792449267 | 1.0085288968  |
| K | 19.0 | -1.7427428784 | 2.6073531580  | -1.3055428455 |
| K | 19.0 | -1.1167680935 | -2.2792415153 | -2.2577432220 |
| K | 19.0 | -0.4801159882 | -3.5000869667 | 2.2140318279  |
| K | 19.0 | -0.2206471310 | 1.0623117918  | 3.2191002284  |
| K | 19.0 | 1.9146284124  | 0.8189904545  | -3.6123062360 |
| K | 19.0 | 2.5694135131  | 3.2603769739  | 0.3895416832  |
| K | 19.0 | 3.0800788089  | -1.3904589696 | 0.3443886673  |

## Na1K7-mp2-Def2-SVP-a

energy = -4355.5126193831 hartree

|    |      |               |               |               |
|----|------|---------------|---------------|---------------|
| Na | 11.0 | 1.1510953497  | 0.1290147644  | -2.0751688045 |
| K  | 19.0 | -1.9041557996 | -2.3314465035 | -2.8035838933 |
| K  | 19.0 | -2.6936265616 | 1.9576282027  | -0.9841464624 |
| K  | 19.0 | 1.4056589113  | 3.9112413689  | -0.4938148666 |
| K  | 19.0 | 4.1093984657  | 0.1802119194  | 0.7737396076  |
| K  | 19.0 | 1.0554653279  | -3.2164912447 | 0.7728837239  |
| K  | 19.0 | -3.2291825429 | -1.7338593328 | 1.7849178639  |
| K  | 19.0 | 0.1053468495  | 1.1037008255  | 3.0251718313  |

## Na1K7-mp2-Def2-SVP-b

energy = -4355.5109568341 hartree

|    |      |               |               |               |
|----|------|---------------|---------------|---------------|
| Na | 11.0 | -2.4723299686 | -1.3182421566 | 1.3939844917  |
| K  | 19.0 | -2.3163840262 | -2.5378629341 | -2.5310055025 |
| K  | 19.0 | -2.7935179165 | 1.9847887012  | -0.9867419266 |
| K  | 19.0 | 1.2768351459  | 3.8552349514  | -0.2213919192 |
| K  | 19.0 | 3.9318326292  | 0.1912145036  | 1.0229613437  |
| K  | 19.0 | 1.0442517590  | -3.3116176792 | 0.8119596511  |
| K  | 19.0 | 1.3719547665  | 0.0228126702  | -2.8598677361 |
| K  | 19.0 | -0.0426423892 | 1.1136719436  | 3.3701005980  |

## Na1K9-mp2-Def2-SVP

energy = -5553.7021252089 hartree

|    |      |               |               |               |
|----|------|---------------|---------------|---------------|
| Na | 11.0 | 0.0000118376  | 0.0000677937  | -0.0000530812 |
| K  | 19.0 | -3.4073291857 | 0.8111342138  | -2.0501203911 |
| K  | 19.0 | -2.6391051162 | 2.2530534956  | 2.3441090472  |
| K  | 19.0 | -2.0936933645 | -2.4001091159 | 2.5154951210  |
| K  | 19.0 | -1.3709629615 | -3.4114636345 | -2.0049955325 |
| K  | 19.0 | 0.2834167084  | 3.9456470425  | -0.9075232231 |
| K  | 19.0 | 1.1534627931  | 0.0601058097  | -3.8907760488 |
| K  | 19.0 | 1.5970320931  | 0.7342010650  | 3.6580734339  |
| K  | 19.0 | 2.4669891277  | -3.1510212940 | 0.6749062203  |
| K  | 19.0 | 4.0101780681  | 1.1583846237  | -0.3391165457 |

## Na4-mp2-Def2-TZVPP

energy = -647.4541776850 hartree

|    |      |               |               |               |
|----|------|---------------|---------------|---------------|
| Na | 11.0 | -0.2383712928 | -0.0073498891 | -0.1689472454 |
| Na | 11.0 | -0.8053783484 | 0.0073500641  | 3.4195619554  |
| Na | 11.0 | 2.9568445682  | 0.0073501546  | -1.8908030804 |
| Na | 11.0 | 2.3898380731  | -0.0073503296 | 1.6977073702  |



## Na5K1-mp2-Def2-TZVPP

energy = -1408.4311050680 hartree

|    |      |              |               |               |
|----|------|--------------|---------------|---------------|
| Na | 11.0 | 0.0852404664 | -0.1060531232 | -0.0230794273 |
| Na | 11.0 | 0.0344929476 | -0.0890249550 | 3.6196960801  |
| Na | 11.0 | 3.5615478926 | -0.2001169938 | -1.1046415038 |
| Na | 11.0 | 3.4842035521 | -0.1792604225 | 4.7849505719  |
| Na | 11.0 | 5.6639978066 | -0.2447755025 | 1.8707206466  |
| K  | 19.0 | 2.6384353347 | 2.5116229972  | 1.8207006325  |

## Na6-mp2-VTZ

energy = -971.2090822579 hartree

|    |      |               |               |               |
|----|------|---------------|---------------|---------------|
| Na | 11.0 | 0.0287958967  | 0.0871227206  | -0.0673464999 |
| Na | 11.0 | -0.0255947920 | 0.1116085876  | 3.6621333513  |
| Na | 11.0 | 3.5922070026  | -0.0097580032 | -1.1775878712 |
| Na | 11.0 | 3.5084697960  | 0.0089943106  | 4.8602552100  |
| Na | 11.0 | 5.7491019308  | -0.0460839165 | 1.8652850162  |
| Na | 11.0 | 2.6149381659  | 1.5405083010  | 1.8256077936  |

## Na7K1\_mp2-Def2-SVP-a

energy = -1732.1983194431 hartree

|    |      |               |               |               |
|----|------|---------------|---------------|---------------|
| Na | 11.0 | -3.2480671036 | 0.3415019031  | 0.5356621022  |
| Na | 11.0 | -1.3061758118 | 2.3936280137  | -1.8760979138 |
| Na | 11.0 | -1.2910121537 | -1.2363188785 | -2.0914518870 |
| Na | 11.0 | -0.6710994065 | -1.7317517433 | 1.7176037887  |
| Na | 11.0 | -0.1857987406 | 2.0098953817  | 1.5602415464  |
| Na | 11.0 | 1.8618278744  | 0.9443699242  | -1.4284048527 |
| Na | 11.0 | 1.7094592931  | -2.5865489658 | -0.8235819277 |
| K  | 19.0 | 3.1308670486  | -0.1347756351 | 2.4060281440  |

## Na7K1\_mp2-Def2-SVP-b

energy = -1732.1962634695 hartree

|    |      |               |               |               |
|----|------|---------------|---------------|---------------|
| Na | 11.0 | -3.2275619142 | 0.2831971040  | 0.6619870159  |
| Na | 11.0 | -1.3548633601 | 2.3492692489  | -1.7478035176 |
| Na | 11.0 | -1.2004776621 | -1.2503215634 | -1.9410146544 |
| Na | 11.0 | -0.7629775222 | -1.8547985162 | 1.9103716839  |
| Na | 11.0 | -0.1760744745 | 2.0110268270  | 1.6442836847  |
| Na | 11.0 | 2.4850723010  | -0.2180905695 | 2.0036958956  |
| Na | 11.0 | 1.7284070944  | -2.6206269694 | -0.6489565700 |
| K  | 19.0 | 2.5084765377  | 1.3003444387  | -1.8825645380 |

## Na8-mp2-VTZ

energy = -1294.9768715211 hartree

|    |      |               |               |               |
|----|------|---------------|---------------|---------------|
| Na | 11.0 | -2.3704103080 | 0.0129742241  | 1.1471672839  |
| Na | 11.0 | -1.9756512294 | -1.2635460579 | -2.2318884377 |
| Na | 11.0 | -0.5793328767 | -3.1127215356 | 0.6730759183  |
| Na | 11.0 | -0.5603106141 | 1.9052037223  | -1.7292683768 |
| Na | 11.0 | -0.1933096763 | 2.6830480942  | 1.8011020401  |
| Na | 11.0 | 1.3259146669  | -0.5939558373 | 2.1964512833  |
| Na | 11.0 | 1.6047591614  | -1.3242713123 | -1.6144178040 |
| Na | 11.0 | 2.7483428761  | 1.6932687025  | -0.2422229072 |

## Part III

Structures obtained at the MP2 level  
(sub-valence correlated, see text)

K5-mp2

energy = -2996.6148853600 hartree

|   |      |               |               |               |
|---|------|---------------|---------------|---------------|
| K | 19.0 | -1.1491987524 | -0.5403061331 | -0.9777627362 |
| K | 19.0 | 0.7743490203  | 2.8298078639  | 1.4296866149  |
| K | 19.0 | 0.7617436102  | -4.4233399078 | -0.8534066934 |
| K | 19.0 | 2.6492677477  | -1.2862895683 | 1.4455981825  |
| K | 19.0 | -2.8244893759 | 3.4500529652  | -0.8852197579 |

Na1K4-mp2-a

energy = -2559.3231957065 hartree

|    |      |               |               |               |
|----|------|---------------|---------------|---------------|
| K  | 19.0 | -1.1796603617 | -0.5601945057 | -0.9575961589 |
| K  | 19.0 | 0.7417142928  | 2.8173337196  | 1.4541615208  |
| K  | 19.0 | 0.7671587526  | -4.4309629783 | -0.8504124631 |
| K  | 19.0 | 2.6697679454  | -1.2696439517 | 1.4198332613  |
| Na | 11.0 | -2.4941691613 | 3.0515527877  | -0.6390970260 |

Na1K4-mp2-b

energy = -2559.3206055940 hartree

|    |      |               |               |               |
|----|------|---------------|---------------|---------------|
| Na | 11.0 | -0.7700724115 | -0.3666586300 | -0.6538291955 |
| K  | 19.0 | 0.7751105220  | 2.8073199508  | 1.4227592796  |
| K  | 19.0 | 0.3591472377  | -4.0223108234 | -1.0104743198 |
| K  | 19.0 | 2.6330118184  | -1.2707723227 | 1.4386417059  |
| K  | 19.0 | -2.7855249167 | 2.8823470451  | -1.0382018602 |

Na1K4-mp2-c

energy = -2559.3209820723 hartree

|    |      |               |               |               |
|----|------|---------------|---------------|---------------|
| K  | 19.0 | -1.1482407267 | -0.5390312400 | -0.9772635651 |
| Na | 11.0 | 0.5678202596  | 2.4758978138  | 1.1743682521  |
| K  | 19.0 | 0.8473291260  | -4.3824264690 | -0.7807830650 |
| K  | 19.0 | 2.5244463561  | -1.0723027363 | 1.4260133553  |
| K  | 19.0 | -2.5796827652 | 3.5477878513  | -0.6834393673 |

Na2K3-mp2-a

energy = -2122.0286977522 hartree

|    |      |               |               |               |
|----|------|---------------|---------------|---------------|
| K  | 19.0 | -1.1764016359 | -0.5343481649 | -0.9479181591 |
| Na | 11.0 | 0.5680426897  | 2.4466931797  | 1.2167581038  |
| K  | 19.0 | 0.8262315846  | -4.3771472628 | -0.7937311855 |
| K  | 19.0 | 2.5758913409  | -1.0852130558 | 1.4180268858  |
| Na | 11.0 | -2.2889525792 | 3.1581003340  | -0.4662465850 |

Na2K3-mp2-b

energy = -2122.0291804144 hartree

|    |      |               |               |               |
|----|------|---------------|---------------|---------------|
| K  | 19.0 | -1.1697811260 | -0.5507152389 | -0.9504695802 |
| K  | 19.0 | 0.8349086251  | 2.5799571966  | 1.4396520343  |
| K  | 19.0 | 0.9937134408  | -4.3119981501 | -0.6604576066 |
| Na | 11.0 | 2.2590304865  | -1.1989181590 | 1.1697697357  |
| Na | 11.0 | -2.4130600264 | 3.0897593813  | -0.5716055233 |

Na2K3-mp2-c

energy = -2122.0317710639 hartree

|    |      |               |               |               |
|----|------|---------------|---------------|---------------|
| K  | 19.0 | -1.1930333532 | -0.6622223606 | -0.9956632361 |
| K  | 19.0 | 0.7680726679  | 2.6988135334  | 1.4331138153  |
| Na | 11.0 | 0.7357663431  | -3.9897739102 | -0.7339303315 |
| K  | 19.0 | 2.6664759325  | -1.3943039352 | 1.3797637909  |
| Na | 11.0 | -2.4724701902 | 2.9555717028  | -0.6563949785 |

Na2K3-mp2-d

energy = -2122.0286898395 hartree

|    |      |               |               |               |
|----|------|---------------|---------------|---------------|
| Na | 11.0 | -0.8082621824 | -0.4263911278 | -0.6441398251 |
| K  | 19.0 | 0.7157017459  | 2.7934069623  | 1.4292305075  |
| K  | 19.0 | 0.4054122760  | -4.0658814659 | -0.9838070552 |
| K  | 19.0 | 2.6471525793  | -1.2282402180 | 1.4150480522  |
| Na | 11.0 | -2.4551930188 | 2.5351908793  | -0.7894426194 |

Na2K3-mp2-e

energy = -2122.0270488244 hartree

|    |      |               |               |               |
|----|------|---------------|---------------|---------------|
| Na | 11.0 | -0.5831023237 | -0.3074432608 | -0.4733124153 |
| Na | 11.0 | 0.9615103187  | 2.3172343978  | 1.4268797424  |
| K  | 19.0 | 0.2608694646  | -3.9808287353 | -1.0518832350 |
| K  | 19.0 | 2.7243528721  | -1.3690060081 | 1.4024021377  |
| K  | 19.0 | -2.1895339518 | 3.1890413163  | -0.5237014498 |

Na3K2-mp2-a

energy = -1684.7344210094 hartree

|    |      |               |               |               |
|----|------|---------------|---------------|---------------|
| Na | 11.0 | -0.7768083526 | -0.4039703453 | -0.6787932850 |
| K  | 19.0 | 0.8101263347  | 2.6050280135  | 1.4092569003  |
| Na | 11.0 | 0.6252074779  | -3.5208099173 | -0.7084637239 |
| Na | 11.0 | 2.1801174245  | -1.1899982539 | 1.2271884596  |
| K  | 19.0 | -2.7920100044 | 2.8438122630  | -1.0279186809 |

Na3K2-mp2-b

energy = -1684.7350612106 hartree

|    |      |               |               |               |
|----|------|---------------|---------------|---------------|
| Na | 11.0 | -2.1567321845 | 1.3063176595  | -2.7580067362 |
| Na | 11.0 | 1.7756442404  | -1.5411392004 | 1.2029622457  |
| Na | 11.0 | -0.6874656195 | 0.8890279940  | 0.2613160343  |
| K  | 19.0 | 0.6040446692  | 0.9129275394  | 3.9105097943  |
| K  | 19.0 | 0.4645078944  | -1.5671339927 | -2.6167823382 |

Na3K2-mp2-c

energy = -1683.9157422423 hartree

|    |      |               |               |               |
|----|------|---------------|---------------|---------------|
| Na | 11.0 | -0.7596947906 | -0.4750319601 | -0.6496629969 |
| Na | 11.0 | 0.6145661167  | 2.3022296037  | 1.1350947474  |
| K  | 19.0 | 0.6234979808  | -4.2695181336 | -0.8617561638 |
| Na | 11.0 | 2.2208655169  | -1.2037192118 | 1.1855935652  |
| K  | 19.0 | -2.7313783538 | 3.0407156918  | -0.9623498619 |

Na3K2-mp2-d

energy = -1684.7346864980 hartree

|    |      |               |               |               |
|----|------|---------------|---------------|---------------|
| K  | 19.0 | -0.7384089452 | -0.5608314249 | -0.8699045400 |
| Na | 11.0 | 1.6622973669  | 1.8335603161  | 1.2702694420  |
| Na | 11.0 | 0.9169694096  | -4.0860361831 | -0.6223369109 |
| Na | 11.0 | 2.5608815348  | -1.6405908763 | 1.0255256708  |
| K  | 19.0 | -1.3253114362 | 3.7034196982  | -0.2230976419 |

Na3K2-mp2-e

energy = -1684.7372235905 hartree

|    |      |               |               |               |
|----|------|---------------|---------------|---------------|
| K  | 19.0 | -1.1503240672 | -0.4537994126 | -0.9057783813 |
| K  | 19.0 | 1.0245053427  | 2.7111967437  | 1.3834853973  |
| Na | 11.0 | 0.8976029267  | -3.7320136116 | -0.5231639448 |
| Na | 11.0 | 2.3036404197  | -1.1360556882 | 1.1599251844  |
| Na | 11.0 | -2.2450437718 | 3.2305084189  | -0.6067473657 |

Na4K1-mp2-a

energy = -1247.4408560505 hartree

|    |      |               |               |               |
|----|------|---------------|---------------|---------------|
| Na | 11.0 | -0.7747506824 | -0.4759516248 | -0.7135543144 |
| Na | 11.0 | 0.5902236460  | 2.1997911831  | 1.1189995655  |
| Na | 11.0 | 0.6625844545  | -3.5708897821 | -0.6401951877 |

|    |      |               |               |               |
|----|------|---------------|---------------|---------------|
| Na | 11.0 | 2.1271108281  | -1.0663040011 | 1.1359943178  |
| K  | 19.0 | -2.6051682464 | 2.9133542251  | -0.9012443814 |

Na4K1-mp2-b

energy = -1247.4427531267 hartree

|    |      |               |               |               |
|----|------|---------------|---------------|---------------|
| K  | 19.0 | -1.2203566462 | -0.5699352982 | -1.0161989625 |
| Na | 11.0 | 0.6141639199  | 2.2457276051  | 1.1326189715  |
| Na | 11.0 | 0.9620095371  | -3.7537056829 | -0.5105002733 |
| Na | 11.0 | 2.1075492451  | -1.0226495987 | 1.1354445744  |
| Na | 11.0 | -2.1802209859 | 3.1728924946  | -0.5447290100 |

Na4K1-mp2-c

energy = -1247.4428826016 hartree

|    |      |               |               |               |
|----|------|---------------|---------------|---------------|
| Na | 11.0 | -0.7968041215 | -0.3150503697 | -0.6496506418 |
| K  | 19.0 | 0.8651351008  | 2.6035582454  | 1.5402099958  |
| Na | 11.0 | 0.5484611103  | -3.4659396929 | -0.7213133400 |
| Na | 11.0 | 2.1912622713  | -1.1669611809 | 1.1914708677  |
| Na | 11.0 | -2.2971094010 | 2.7248168483  | -0.7213094818 |

Na5-mp2

energy = -810.1486504773 hartree

|    |      |               |               |               |
|----|------|---------------|---------------|---------------|
| Na | 11.0 | -0.8364706452 | -0.3971479763 | -0.7292628582 |
| Na | 11.0 | 0.5967651415  | 2.2283185361  | 1.1329866210  |
| Na | 11.0 | 0.5931501305  | -3.5030617873 | -0.6682867041 |
| Na | 11.0 | 2.0937959065  | -1.0209856467 | 1.1262655625  |
| Na | 11.0 | -2.2355682833 | 2.7228020941  | -0.7028070112 |
